# Supplementary material for: Tissue-Specific and Time-Dependent Expressions of PC4s in Bay Scallop (Argopecten irradians irradians) Reveal Function Allocation in Thermal Response
Source: MDPI journal article supplement (doi:10.3390/genes13061057), 2022-06-13
Supplement: s1 [file s1]

>Arg0159040.1

Gene sequence:

AAAATTTCAACGTTTACAGTAAGACTGAATTGAGAATCTGATCAACTTCGACATATAAA  
AGACAAAAAAAAGGTATTTTTGCAAAAGCATGTATGTATTTATTTAGTGAAGATTTCCAT  
TAAACCAAACCTGACATGGCAGTCTAATTTTCCACATACCCTTCCTTTATGTATTTGCAT  
TAAGACAATGAATCGATGAAAATTCTCTCCAAAAAAGATAATTTTACAACATATGAACT  
GTACAAAAATTGGTAGATCACTATACATCTAACTATCACTAGACTTGATCTTATACAAAC  
CTTATAGGCAGCAGATAGATTTACTGAGCAGGAAATGAACCTAGCCTCTAGTATAACTA  
AAAAATATTGTCTATAAGTATTGATGCATTTTATACAACCGTACCTCTTCGTTAAAATCAA  
AACATATCACATTTTTTCATTGAAAATTCTTCATGTATAGTGTTTTTATTTTCTACAAAATT  
TGACATGAATATTACATTTTTCAATTACTAGATCAAAATTAGAATTTGCATATGCATGATA  
GAAATGGCAAAACAGCTGTATAACTATTTTGTGACTAAATTTCTTTTCCTCCTCAAATAG  
ATCTAGAGGCCATTATGAAATCTTTAATACTGAATAACTATATAAGAAAACAACCTATCG  
TAACTTATAAGTGTACCAGTTGATTCTAAACCACTCAGCTATCTGTACAACAGGGGCTT  
GCTGACAATTCAGGTCCTACTGTGTCTATGTATAAATTAAGTCACCAGAATTAGTACA  
TAGCCCCTGTGATCTGTATGTCATGACACAGAACAAGGGAGATAACTCTTAATTTTCAT  
AAACTGAAAATAAAATTAATAATGATTACTAATTAATATAGTTTTATGTATACAAAAATAA  
TCACATTCAAACATAAAATAATATTGTTTTACTCTTTCTTAAAAGCTTGAAAGCATTTCAT  
TAAAAATTTGACTAATCATTTGAAAGAAAATCCAAATCACCAAAATATACTGGTGAAAA  
GAGAATCTGAAATTTCCAAATCAGATCTGACCTGTTGATAGTAAATGATCTCTAAAACC  
TTTCGTAAATATAAATCTATCCATATCTTATTTTTATCAGATTTTTATCAAATCCAATTAA  
GAATTCGGTAATATCAAATTTAAAGGAACCTATATATGAATATTTCTTCAATTCGACACAAT  
GGAAATTACACGATGCGATTTAAAGTCCCAAAACATCTGGTATTCAAGAGGAAGTGAT  
AAAAAATCTGAAATCAATGTAAATTCTTGCCTTTGTGAAGTGTACCATGCAATGAAAC  
CAATGTCAAATTCCTGTCTGTAAAGTGTATCTGTAAATAGCAAGAGCTGCTCAATACTAT  
TCCAGTAACATACTGTACATCTGTACTATTACAGGCCTTCACTGAATATATTTTAATCATA  
ACTATAGACCAATGGCACAGAAAACGTTTCATATCTATCAGCATGAGTATTATACTATTGA  
AGGGCATGCATCTGTATCATGAAGTACATGTACAAAACAACACTAATTTTCTATTGACTT  
TTTTTGAACTCTTGTTAAACTGTTATTCAATACTAAGACTTCATCTTTTACTTCAAATTA  
TACAAACAGTTCATTATGTTCCGTCCGTGAATGAATATGTGAAGGATGGAACATGATCA  
TTCCAGACTTTACGTTTACCCAGGTACACCGTTGGGGTCGAAAGTCCTCTTGATCTTGA  
AGTTTAACCAGGTTAGTCATTTTCTCATAGTTTAGGATTAACCAGGTTAATCAAGGTCCA  
CGAACTCTGTTCCAGAATAACAATGTTCCCTCTTCACTGCATAAAATATCTACAGATTG  
AAGTTTTAAAAGTCGATGATGATACGTAGAAATATTATAAGTGATTTTCATTGTTTTTCT  
TTTCATTTTCCTCCACAAGCACCCCGTAGCAGCAGCAGCATCAGCTTGCTTCTTTAA  
TTGTTTTTGTGCGATTATTTTCAGCATCTCTGAAAAAGAACAACACAGATAAAGAACATG  
GCACCATGGCATGATTTTCATGTTGAGGAAAGAAAATCTGAAGCCCTGACTTGATTTTTC  
CTAAAATAAAAATTAACCTTTGTTCATTTGGTCATGATCACTTTTTATCAAACGCTTCAA  
AAGCAAGAAAAAATATTTTGCACCTCTGTATTGCATTTGTATTTAAATTAGTCTTAAACTA  
TATTTGGGGCTGATCGTGGACCCAATTAAGGAGTCAAGCTAGAACGAATTGCTCTGAC  
AACTATGATCAATATTCAATTCACAAACCTTTCGATTATAATGTTTCATCAACTATTATTG  
GTAAATCAAAGGCAAACACAACACATGTATATAATTCTGTTCAAATACGCCGCCATAT

TTGATTTACCGGAAACACTCAACAGGTAAAATATGTTTAAAAGTTTTAAAAAGCCAAC  
AAACTAAGAATAAACATGGTGAAACTGAACAAATGTAAGTACCGTATTTTCCCTATTAA  
GAGCGCTAGCGCCTCCTCTAATAAGGGCGCCCCACGTTTTTTGCTGAAAAAATCAACT  
AATTTCATACCATTTTTGTGCCAGATTGTGACGACTTGTCTTGCAGACGCTAATAAAAT  
ACTGTTTCACATCAATCTGATGCTTAACAGATATCCGATCAGCTATAAATTAAATTGATT  
GCATTGGACAACCTTAGGACATCTTTGTCAAGTGTTACACATAGAAACAGCGAGAAGG  
CCATGTTCAAAACAAAACGTGTCACTTGAATACCCACACACGTGTCTGGATGAAGAC  
TAACTGGCAACAATATTTAGCGATGTCTATACAGGTTTTATGAATATTTACTGTATATATA  
TGATAAAGGTTCCCTAAATAACAGGAATGTTATCATTCTAAGCATTTTATTGTGTGCTCT  
TGTCGGTAAAAAGCAATCGAAAGCACCGTCCACCATTTTGTGTATGCATGGTAAACAA  
AGAGGCTAGCATGAAATGCTAAATTCTGTGAAACAGACATATTCATACATTTCTTCATAA  
TAATGTAATTTCAATACTTACTTGACTTCAAAACGTAAGTTGGTTATAGAAGTTTCAGAA  
AAATACAAAACCTAAAAGCAAGATGACTATATATAGTCTGTTTCAGAAAAAAACATCTAA  
AAATGGTCTCAAATAACGGCCCCCTCCTAAGACATTTACCAGCCCCCGCGTCCTCATT  
AGGGAAAATATGAAAGAATTAAGCAAAAAATAATTTTTAAAATTCATGTGAAAACTTT  
GACATTATATTTCTTTCGTAGTGAACATTTGTAGGTCATTCCATATATGGTACAAGGTGCC  
ATACATATATTTGGAGCGCGAGACTTTCTAACGAGAAGCATCATGGCGGCCAAGTGAGC  
CGTGTCCGAGATGAGAGCCATTCAAAAGTGCTTCAAAACATAATTTAGACATGGAGGT  
GGGTAAATAAATAATTATTTTATGTTTAAAATGTTTGATATTGTTGATTTTAATTACAAAAT  
TACATGACACACATGAAATGCAACATTTTCACTACGGGCAATGGGAAGAAATCGTAGAT  
CTGACGACGACCATCTGTCAGAAATCTTTCGTCCTTCGTTTCAGAGCTACATCAACACAG  
CTAGCAAGCATGCTTCCAGTATAGGGCTGAGTCGATTATTCGAATAATCAGAGTCGATT  
AGATTAATGAAACTAATCGCTGATAATCGATTAAAGATTTTATTAATCGTTAATTGTAAAA  
TGCATAGCAAGTGCATCTCTTTATGTACACGTTTTTGAACCTAACAAAGCATATTATATGA  
TGTGAGAAATACTTGTTAAATTGCGTCTATGTTGAAGTAAAAATTCATTAATCAATGAGA  
AAGTGGATGTCATGAGAAAGTTTGCAAGTTGCAACACGCGGTACGCTGCAGGGGTGCG  
ACATTAACTTTTAGATGTACTTGTCCCTTTGGACAATGCAAGTGAAAGGTTAATTCACT  
TGTC CGAATGCAATTATTACTTGTCCGACATAACTTATTTTGCTGCTTTAAGTTCCATTAA  
CTTAAGGTATGACATGTTATCGATTATGATACAATAACAAATGTGCAAGTGGAGTTCTTG  
ATTGAAATAAAGTTTAAAGTATGTAATCATGTGTCTGTTTTCTTCTGGTACCGGACAAGCG  
TTAATGTGACCCCTGCGCTGTTCCGCAACTTTCCTAGCGAAACGGCTCCATGTTGTT  
ACGTCAGGGAGGCCTAATCGCCACCGGGATGCTCGGAAGCAGAAGGAGCAGTAGTCT  
TAAACATTTTAAATTTTACTATTGCATGTGTTTATCATAAAAAAGTATGTTTTTTCATATTCT  
TATTGAAGATAAGAGCTGTTGATTGATTTTTTTTTTTTTTATCATGGAAATAAAAAAGTTC  
ATTGACGAAAATTTGGTCAATCCAGATTAGTTGATTAGTCGTAGGTGTGAAGGTCATGT  
CAAAACAGCGGGTTAGCAGACTGGATTTAAACGATGTTACAGAAGATGATACAGGGAC  
GGAATTCAGAGCTTATTTGGGGTAAAAATGTTTGCTTTGTCAATAAATCTATTCTTATTTA  
TTGGTAGGCTTATATTACGAAGGCATGTGCTCTGTCATATCTTACAGTAGGTGTTATTATT  
AGTTGATATCAAAACATGGCGGACGTTTTTCAGTAGTCAGTATTATCGATTACATGTGACC  
GAATAATCGAATACAAAAATTACTAATCATTTTCAGCCCTATTCCGGTATATACTTATTAAG  
CATTAGTCTATATACAAGAGGCCCATGGGATTTAGCAGTCACCATCGGATACAGAATGA  
AACAAAGACATATAAACACAACATATATATTGGCCGTTTCAGGCCCTTGAATTTAGTCAA  
GCGATTTTTATAAATTTGACTTTTTTAATATATATGAAGAGTATTATTTGGTTCCATCAAGT  
CTCTGAATTCAAAAGAAGACCTTTTTTTTTTTTTTTTTTTTTTAAATTTTGTCAATTTTGACC

GCATTTGGCCCCGACCCACTGGTCATGGGGGGTCTGTCAGTGAGGACCGATATAGATAT  
GTAAAATGATATATTTTCAGGGTAATATTTCTAACAAAGTTTGACTTAAGCTTATTTCTA  
CGAAAATTGAGTAAAAAATGCTCATAAAAGTGTTTTTCTATATACGGTAAACCTTCGG  
TTAGTTCGAACAAAATTAAATAAATATTGATGGACCAGTTTGAATTATCTGAAATTAAGC  
TTCAGGAAAAAATCTTGAGTTCGAACTATCCGAGTTGAAATCAGTAAAAACCAGTTTT  
GTACCGATGTACCTGGCATAAGCAATGTAAGGCAGAAAATCTATAGGGAAAAATATTTAG  
TTTTCTGAAGATATTATATTCAACCATTTTCTCGTAATCATGAGCATTTAATTGGTGAATT  
TATAATTAATTGCGTAGCAGAAGCCGCATGCATATGTGCACGGGGACAAGGCCCCAAAC  
AGCACCGTTCACGATCGCAGCCCATAATTTACATCGACGTCCGTAACTGAGATAGAAA  
CTTTATTTAAACCACAGAAAATCTAGTTAGATCTTTGTTATATTTTCGTAACAAACGTAAA  
AATTTTTTTTTTAATTTTTTTAGTTAAAGAAAATCTGGTTGTATTTACGAAACTGCTGTTG  
AGAATATTTGTTTACATTCATTTCTAAAATTAGGTCACAAGCACACTGTGACTGTCAGAT  
TGTCAAAATCCGATTGCATATTGTCTGCTTCTAAAATGATGTAACCTAGTTTTAACCTGA  
TGAAAAGCTACGTATCTATTGTTCAATTACCCAACACGTGGATTGTTTTGGCTGGAGCT  
GAATATGTAATCACACTCACTTGCTGTGACCCAAGGCTGGCTTTTGATGTTGCTGTGA  
CACCTCGTAACTGGCCTGGCCAAGCCAGCATGAGGCACGCACATGTTTACAGGTAATT  
TAACACCTTGATTGGCTGATTAAGGATAGATTGAATGCATATCTTAATGTCAACTTAAAC  
TGATATCCGTATCTAGATTGGACTTCACAAACATTGGCGATTCTTCCACGTGTTCCAT  
CAGGTACAGCGAATTTAAATATACATTGTCTGGGGCCTAAGATTAAACATTTGGCCTTGC  
TGCTTTGTGTACGATATATTGGCATAAATAATTTTTTATTTATGGCTTAAAATGTTCACTACT  
TATCTGTCTGATGGTCATAATAATGATCATTATACAATCTTTATTCCAAACATCAAACT  
GTTGCAATATGCAATAGGGACCCCATTCGCGCCGGTTTTCCGCCAAAAATCTTACTTTTA  
CATTCATAATTTGACGTGTTTCGAACTATCCGAAATAGGATTGATTATAAAAAGTCAGTGT  
TCGAACAATCACTAGCTAAAAAATTATCGTTTTTCTGGAAAAAATTGTGTGTTTCGAACT  
ATCCAGCGGTTTCGAATTAACCGGAGGTTTACTGTATAGTAAATTTGATCCTCTGGCCAG  
GGGAAAATCCGAGATCCCAGGTCTATGAAATTCCTCCGAGATCCCAGGTCTATGAAAT  
TCACAAATTTTGTAAAAAACCTTAAGACCTATGAAGATTTAAATTGTTTTAGTTATTTTG  
ACTCCTTTTAGCCCAAGTCAGGTCCCCTCTGCTCCTGGGGGTCAGTCAGGACCAATATG  
GCCCCCTCTCCAAGAGGTCCCAAGCTAAAGGGACCCAGGGTCATATAATTCACAATTT  
TTGTAAAGGACCTTAAGATATTTCCATCTATACAGAGTATTTGATTCTACCATTTACAGGG  
GAAGATTTTTGAAGTTTTAGCCTATTTGACCCTTTTTGGCCCCACCCCTGGGGGGCTGG  
GACCATTTAATTCACAATTTTGGTTGACTGTTTGGCCATGGAAGTTTTCTGCAAACCTTC  
AACAAATTTGGTTCAGTAGTTTTTATTAATTATCACAAAGACTCTGACAATTAGAAAAAC  
ATAGCAAAATTGACTCCAAAAGTTTAATTTGAATCACAACCATACAATGATGCTATTGA  
TACAATACAAATATGCTATCCAATACATAGGTTTCAGAGAGAAAGTAATTTATATGAAAAT  
AGTAGCCTAATTGACCTTTTTGACCCCCGTCTATTGCCGTCTAAGGCTCCAGGGGTCAG  
CCCTATCATTTGTACAATTTCAAATCCCAATAAGGATGCTACCATTGCATTATGAGCGTA  
ATCCCATGTTTATTTGCAGAGGAGAAGTCATTTATATGGAAATAGCCAAATTGACTCCTT  
ATGACCCTGCCCTTAAGGCCCCCGGGGGTTCAGCCCCATCATTTGTACAATTTTGGATC  
CCCACCCTATAAGGATGCTACCATTGCATTATGGGTGCTATCCCATGCTTGGTTTCAGAG  
AAGAAGTTGTTTATATGGAAATAGCCAAATTGACCCCTTTTGGCCCCGCTCCTCAGGCC  
CCCAGGGGGTTCAGCCCTATCATTTGCACAATTTGAATCCCGCACTATAACAATGCTAC  
CATTGCAATTATGAGTGCTATATCTTGCTCAGTTTCAGAGCATAAGTCCTTTATATGGAAAT  
AGCCAAATTGACCCCTCTTGACCCCGCCCCCTCAGGCCCTGGGGAGTTAGCCCCATCATT

TGTACAATTTTGAATCCCCACCCTATAAGGATGCTACCATTGCATTATGGGTGCTATCCC  
ATGCTTGGTTTCAGAGAAGAAGTCGTTTATATGGAAATAGCCAAATTGACCCCTTTTGG  
CCCCGCCCCTCAGGCCCCCATCATTTGTACAATTTTCAATTAGTAGCCCATAAAGGATGCT  
ACCAGTCAAATTTTGTGAAATCCGACCAGCGGTTATGGAGAAGAAGTTGATTGTTGA  
CAGACGCCGGACGCTGCGGTATCCCGTAAGCTCACCTCGGTTCTTTGGACCAGGTGAG  
CTAATAATGAAATGATAGCAACTTTTTTAAATCAGAAGCCACTTTCCGCCATTCTTCCACC  
ATCGCATCATTTGTAACATGGTACGTCTGCATATCTTAGACTAAAACTGAGGTTGTATTA  
GAATTTACTTTGCCATTCTGTACCTTTTATGTCTGAATAAGTTTGTTACTTTACTAAAATA  
ATAAGATGAAAATTAAAAAATAATAATAATAATAAGACGAAGTGCAAAGCACTTCTA  
CCTTTCAAATAATGTGTAATAATAATAATAATAAGACGAAGTGCAAAGCACTTCTA  
AGGTAACACATACACGAAAATATAAGAAAAACACAATCTTCAAATTCAATCTTACAC  
ACTGACAGCTTCAGTTTGCGGTCGCCATTTTTTTTTATACATATGGGGAGGTTGTGCATT  
GCTCCGGTACTGCTCTCCCAGTAAATATATAATTAATAATGCAAATGCATAATAGGAG  
TAATTAACATTTTTTTTTTATTTTTAAATAATAATAAACATTATGAAAATTAAAAGCTATC  
GAATGCAGTCAAATATCCACCAAGGCGAATGAAGATGAGCACAAGGAATCATGACGT  
CACATCCGTCAACAAATGGCGCGAAATCAAAGGCTTAACATACGCAGCACTCTAGGCC  
TTGAATGGACACAGAGAAATCTGAATCTTTGAGTTTATTTCTTTGGGTTTATGCTAGAC  
AATTATTACATCATATACTTCTATAGTTAAAGTTTATTACATCATATACTTCTATATTTAAAG  
TATTTACTTTTATTTCTAAATTATAAGAGCGCAGCTCTCTGCGCGGCCGAAGGCCGCGTA  
GAGCGAAGCTCTACTAACCATAACACGTGTGTGAGCATATAGAATCCAATACATTCCAG  
TACCCCTTGACTTTGAAATTGTGTCCCGCGGGAAAATTCTCGCGCCTCCATGTAGGCA  
GCCATGTTTTAATTAATTCTCGTTATCAGCACGGCGAGATTTGAAATTTCTGTACTAGAC  
TAAATATGTTTTCAGTATATGTTTTAAATTAAGTAAATTTGATTTACACATATACA  
AGAACAACGCAATAAATGTACTGGTCCAATATATGACGTCAGTGATGTCATAAAACCTG  
ACGCCAAAGATGACGGCACAGATTCGCGCGTATTTTGATAGCATGGCATGTTGCCAAGT  
TTTCTCTGCATCTGATAAAACAGGATTGAAGTATATTGAATTTTGAATTTCTTTCTA  
ACTATCGATAGTATGTGCATGTCAGTGAAATATTTTATTATCTCGTAGAAAAATATAGACA  
ATATAAAGTTATGATGTTAAATCTTAATCTTTTACATGTAGCTGCGCTCTTCTGAGGCTT  
TGCCTTAAATTCATATTATGCCTTCTACATGAAATAGAAAATAAAATAAACAATTAGAGC  
TTTGCTCTTCCTATGCCGTGCATGATTCATATCAAACATCTGGCTGCGTCCTTTAACTG  
TTTAAGGCCTTGCCCTTCTGTCATATTGATATCTACCTCTCTTTCCTTAGTTCCAGACTGGT  
GGCCTTATTTTTATCGTCTTTTTTACCAGGACCTTTTTGTTGCTTTTTTCATGTTCTTTCT  
CTGGCCTTCTCACGCTGGTTCCCACCTGAATTATGAATAAAATGACTGGTAATATATTTA  
TCTTTGAGAGTGTCTTGATGTAAATATTGCATGATGGTCAGTAAATTTGGGTAAAAAAA  
AAAGGCCTACAAATTGAGATGGAGAGAATACGATATTTTACAGAACAATAGTAAAAA  
AAACTGAGATAAAATCAACGCTATGTGTAAACAGTGATACACTTACGTGTCATTTTGA  
TAGAAGGTTTGGATATAAATGATCTCAAGAGACCACAAGTTTAAAGAAACCCCTTTCA  
AAACAACGTCTGCCTCTGCCAACTAATACGTCAGATATTGCGCATGAGCATATGTTTTT  
GACCAATCATTTTCTGTGTAAGTGCTGAAGCCCGAACATTTTTTCAGAAGCTAGTATCT  
CTTCTTATTTTTAGTTACGTATTTTTATGAAGCGAAAGTAGAGTTCAATATATATATATTC  
AAATATATATTATATTAACAACAATATTAATTGTAAGCATATATCATATTCTGTTGAGG  
ATTAATAAAACCAACTAATTCAAACAAGGCAAACACCGAGAAACGGTTATTGTTAAAA  
TATATCACAAGCCAAGACAGGCTTCCCTTTGATGCAGCTTTCAGCCAAAGTTCAAAGTA  
TATCAAAAAAATACCATATACTATAACATCAGTAGCCGTGCTACCCCAATACTATACGTAT

TTTAAAAATATTTCTTTAAACAAAAAATAGTCTTAAAGAAGATAATTCCATGGTACTAGA  
TGCGAAACCATGGCCTCATATATTTTTTAACGAAAGACGTGCGAAAGTTGAAGACGAC  
GGAATTCACCCTTCCAGGCCACGCCTCCAAGTGGCAACCGAAATCACGTGACCACATA  
CTCCGACAACGAATGTAAACAAACACCGCGCGGGCAACTTAAACGATGGCGGCCGCG  
GTTTCAAACACTGTTTCTTTTACGGAAATTCCCGATGATTTTGTATGGAATACTTTCCA  
AATGTTTCATTTTCTGAAAAATGTCTGACCAAGGGCACTATTTATTTTAAAGAAGGATAT  
ATTCACAATATGAAAGTGTCAAAAAATGCATCTGAAATCACCGTTGGGGCTCGTTGTTA  
CCGCAGTATGAGGAAAGGAGAAAAACCACATCTTCTCAATTTGTGTATTTGTTTGGCCA  
AAAAGCGCATTGAGGACTCATACTGTTCTTGCCTGCTGGGTAAATATCTAGCATGTTT  
ATTTGTTGTTGTTTCTGTTTCAATAAAAACAGTGTTTCATTAGTTTATCTTGTGTGTCATCA  
CGTACGAACATTCATTACTTTTTTCTTCTCTTCGTTTGAGACTTTGTTTGGTTTGGTTTA  
GACAAAAATACTTCAGCACTTTGCTACAAAACATAACATTATTGACAGAAACATATTCA  
ACTTGAAGAAAAATTACTCTTATTTACTGTAGAGGCTTTCTTCACATGCCTTGTTTATAA  
CTTACTAGTACAGATGATCAAGAAGACACCTATACATGCTGTACTGTACAGTAGGCCTA  
ATATATATTCCCCTACTGTATATCATGAACATTGTTAACAAGTACTGTACAGAAGGCTAC  
AGCTAGTACCATGAGAGTTTGAAGAATCCTCATGTCATGTTTATCTGACCTTCCATCTCT  
ATAATCATGATCACGAGTCACTGGATATTTTATTGGTTGCAGATGTCCACACACAGAATT  
TAAAAGTTTCCAACCTAGTTAAAACTGTTTTGTTTTCTTCCGTCTCTTCATATTTATACAT  
TTCACACATTAACACATGTGTATACCCTATCGACTTAAATATATGTACTTTTTATGTGT  
AAAATGATGACAACAAATCATAACAGATAAAGGACTTGACACTTTATTAGTGAACAGGT  
GCTCTAAAATAGCACCTATTGCCATGAATAAACATGTACATGCCTGCTATTCTAAAGTGC  
AACCGTTCAATTTACATATTTATTCAACAGTTTGTTTACAGTTTCAATTTGTTTTTTTTTA  
CTAAACTAAAGCTTATATTCATTATTACCAAGGCAACACTGCAATATATCAACCATACT  
GTATTATAAATGATCTTATCAGGTAAACCTACATTAACCTATGTAATAAAGTGTGATCTTGT  
TATCAGATAAATTGATGATGATAAATTGATATTTAAATGTGTACAGTAGTTTGTAATAATT  
CTGAACAAATTATTTTAAAGTTTAAATACCAATGTCTTCTAGTAAATATGTATTAAGATC  
AAAGTCTGGATCTTATATTCTAACTAAGTAACAATTAACAATGTTTATAAGAATGTGACA  
TAACAATACATTATAGATCTGGAGGGAGATGTTCCCATATAGTGGGGCTTGTCAGAGTA  
TTCAACAACCTGAACTTCTCGGAATTACTGAAGTTCCCGCTGAACAAGCATGCACAAG  
CATACCACAGACATGGCATATTCCTCGGGGAAATAAAATCAAGCCTGTGTGTCAGTCAACC  
AGGTAGTGGTTGTAAAAGCCAAAGAACTCATAAGAAATCGCCTATCATCCCACAAGT  
TGTCAAATCTGACAGGTACAAGACAATAATCCCATCTAACCTAAATTAATTTAAATAT  
AGTATTATTTAAGATCTTTAAGTGACATTAAATATCAGTTAACCCTATTTTGAATTAGCT  
ACACATAGCATTATGAACAAAATCATAATAAATTTACAATGTAACTTCTCTCTATTATGA  
TTTTATGAAATAAGCAAAATTGTTGGCACTTCATTGCAATAGATGTGATCTTCAAAAATA  
CAATGTTGTAAACCATTAACACAGGTTTTTGAACCTTACTGAACAACACAAACAAATCCT  
GAAAAGTGTAAGGGTGCGCCAATATCAAATCTGAATTTAGAAGCAACACCAGTTGTA  
TCCTGCAACCCTGTCCCTGTGTTACTTGGATCAGTACTGTCTTACCAGGTATGTACATAG  
TATGTTAATTTACTTCTTATGACTTTTAAAGCAATTTAAGTTATGCATACATGTACTACTT  
AATATAAGTTTTGAATAACAGTAAAAGACAGAGTTATTCAAAGTATTACATTAACAA  
CATCTGTAGTTATATTTCTACTTATACTTCAAACTGGGTTTTGCCACAGTGTGAGTAAA  
CTACAAACAGTCCATACTTTATTGATGGATCCAAATATACTTGTTGGAATCAAGTCAGAG  
ATTATATTAAAGGTCCTTATTCTGCGGATGGCTCTCTCAACATGAATTCGGTGTTGTGCA  
ATAGTTTGAGTGATGTTGACATTAGATGAAGTTAACTGACATCCTGATGAAACAAATGG

AGGAATGTTAAGGTTTAAACCAAGATTATTAAGTTCCTCAGTAATAGTAAATCCCTTATC  
TGCCATAATGGCATCACCCCTTTTCAATAAAGTTTGCATCAAGAAGTTGTTGCAGTAGGG  
CATAAAATCCACTCTTTGCAGTTATTTCCCTTGTCGACATGGATCCAGTGAAAAGTTCA  
CTTACAAAAATCAAGTTGCCATTGGGTCACATGCTACAAGAGCTTTCAGTGTAGTAGA  
AGATTTATAATCCGAATACATTTGTGACTGTAGTTTTAAAGAAGATGGTTTCTGAGTTTT  
CAACTCTGTACAATCAATAATTGCAATAGACCTTGGAATTCCTTCTGTATTTAGACGG  
CATGTTTCGTAACAATGTCATTCCGATGAGGCCAGATAGGAATAGAGCCAAGGCTAACAT  
ACATATGATCAATCCATGTTAGAAATAGTTCACTCACAGCCTGCACTGAGATGGAAAAT  
CTGTATGCAAGGTCTTTTAGACCAAAATTGTGACGAAGTCTCATCAATGTTAACAGAAG  
TTGATTATCAAGTCCCATATTCATCTCTTTTCTATTATTTTGATGTTGTGGACCTTGG  
GTAGTTAAAACTGAAGCAGATTTTGAAATGTAGAATGTTTAAAGCCTGTATAGTATTC  
GAGTAAACCTTCAACACGAGACTCCTCATTAATAATACTGTTTACAGTTAGTGGTGTCC  
TACAAGAAGTTTCACAGCTATCAGGTATAGAACACGCAGTTGCAGTAGTAAAACCTCTG  
TTGCTGTTCCACGATGGAGCGGTGTTGGCACAGGACCTCATACTGGTGTAGCTGTTCTT  
TAAGTCTTTTAATTCAGCTGCGGCAGACAGAAGCTGCAAAGACGTATCTGAAATTGA  
GAGAAAACAAAATTAAAACAGAATTTGTAGTTATTGATTAAAGACTTTTCTATGTTTGT  
TCAGTCTCAGAAGAATGTCCAATCTTTAAATACCAGTCAGTCAATGTCTTGTGGAGATC  
CTGTTTTCCCTAAAGCTTCCAAAGTCCCATTACCACCTTGGTATCATGATTTAAAAGAG  
CCATCAAGGGTAGATAACCTCCCTACATCGAGAAAGAAACCCGTCCCCAGAGTGCCA  
GCTTCCTTTGGAACCGTCTTAGAGAAAAAAGAATAACAGCATCTCAAATGCACAAAAT  
CACGCAAAGGAAAAAAGGTCCCCTGAAGCTATGCTAAAAGACTTGTTTCAGACCAA  
ATCATTTAGTTCTGTGGCAACTGATTATGGTAGTAGTAGGGAACAAATGGCAAGGGAAA  
GGTATGTAAGCATGGGGTCAGCCAATAACCTGCATGTTTCATGAATGTGGATTAGTCATC  
AACAATGAATTTCTTATCTTGCAGCCACACCTGATGGTAAGGTTTGTGATAAAGGGGA  
GAGTGGCATACTGGAAATTAAATGTCCCTTTGTTGCAAGACAGATGACAATCATTGAAG  
CATGCAACAAAGTGAAAAAATTTGTACTTGTTTCATGATAACAATGTTATAAAAATGAAC  
AGGGAACATCAGTATTATGTACAAATACAGGGACAACCTTCTTGTAACAGGTGCTCCATG  
GTGTGATCTTGTAGTGTATACCACCAAAGATTTGTATATTGAGAGAATTCAGCTGATGT  
TCCATTCATGACATCACTCTTACTTCAACTTTCATTGTTCTACAAATATCATGCTTTACCA  
TATCTTAGAAAATAAAGCTCACCATATTTAGACACTAGCTATATGAAGCGTTACATATAC  
ATGCAAGTTCATAGTTCAAATTTATAGGTAAATCTAATCAGTAGATCCTGTCTATATATGG  
ATATACAGATTTATTTGTGAGATGAGTTGATTTTCTTGCTACACATCATTTCAAATAGTAT  
TTTAGTAATTTGTAATGTGTCTTACTGTGGTATTATACAATGGACCTGTACATACCTGAAC  
CTATATCTTGTTTCATGAGGTTTTTGAATGGTGATGGTAATGGAACATCCTGATCAGCAG  
CCATATGCATGTCGACCTCTTCATCCTTATGATCAGGGTTGTCAGGGTTGTTTCTAAAAA  
AGATAGGTATCATTAGCTACCAGGTAAATCATCAACCGTTTTTTTTTTTATTTAAATCAGA  
CAAATATGTATTTAATCCAAAAGAGTATAACTGAATCACATAGATAAATAAATGATATG  
ATTTGTTATAATAGGTTGTAATATTAAGAACTGATAAAGCTTTTTCACCTCAGTTAAGAC  
TTAAATACTTCACCTCGCACCAGTAATTAGAATAACATTATTAACCTGCAGTCTTGCAAG  
GTGGTGCAAATAGAAATATGTACGTATTTTACTCAACGACTAATCATTTCATAATTTTGAT  
GTGTATGTCAAATATATAATTTATAAAATCAAAAATCACTGAGTAATAATATAATAATTG  
TGTCATGCATGTATAATTTATTGCTTCATTATGTAAAAATGTACATGATTCACAGCTATA  
AATTGGTGGTAAACAATGAAGTTTATTTTGCAACCATGTTCTAAGTATCTGTTTATATGT  
GTAACAGTCTCTCAAAGTTCAATTAAGAATGGTCTGGGTAATTTAAAGAAATGCTGAAA

TAATTATGAGAGAGATACAGAATAAATTTCTTGAAAAACCATGTTACTCCTGACTCTGT  
CTATCTATAATGGTGTAAAAGGAATGGGATAGTGTTAATCAAAATAATATTGGCACAATC  
TACCATGGCTTACATGTACTGGCGACCCCTGGTTCAATTCCTAGTCTGGTCACTTCTACAT  
ATTACAGCTCTGTAAGTTAGGCTTACATTAACATTAACATTCAAGTGCAAATTACTAACCT  
ACTCTGCTGACGTTGTGCGCAATGTGATCTGCTTCTTTGTACAGAGCTTCCATCTGCAG  
ACAGAGGATCAGGAAAATCCAGTGATGGACCATCACACCTTCAAAATGCTATAATAA  
AAAAGACAGATTAACATTAGAGTGAACTGGAAAATAGGTTTACATTACAGAACTCTAT  
CTACTGTAAAGTAGCTATTTGAGTATTAAGATAGAAGCAAATTCTAGATATACTTGATATA  
ATGTACCCGTATGTGCATATATATATGTGTGTGTGTATGATGTTACACATACATGACATA  
CACAGTCAGACGTTTTACACAGCTTGTAATTACATATCAGGGTACAGCAATGTAAATCT  
TGTACATTTCTTGATGGTGTGTGTGCACATATCGTATGTGTGTGTGTGTGTGTGTGTGTG  
TGTGTGTGGGGGGGGGGGGGGGGGGGCATATTCAGTAATTCATGTGTTTCAAATGGGTA  
CAGTATATCCCGAATATGTAGTGCACAATATAGGCCCGGCTTATCGGTATTACAGCAGTA  
TTAATTAACCTGTTAGCATTAATATTGGGTGTAGCCTAGAACGTTTTGTCGTTCTGTCTA  
CATTAAATTGTAAAATTGCTTTGCTGAATAGTGATCTTTTTATTACCCCCATCCACCCCTT  
TATCGTTTTATACACAGGGCCTAATAGACGCCTAAGACGTGACCTATCTTATATATCTCTA  
GTCCGCTAAACCTGCCTATATTATTAGGCTTTTTTAAAAAAATTTTGCCTATATAGACCTA  
TTTATTAGGCAAAATAAATTAAAAAAAAAAAAAAAAAAAAAAGACTAGAGATCTAATA  
ATATAGGCAGGTTTAGCGGACTAATATATCTCATCTAGTAACGAGGCCCTGTGGTTCT  
ACAGGGACAGTCACAACAAATGAGTATAACGTTACTGAAATACCCATTTCAGCATTCACT  
GGAAGTACTGTACATAACGGTATTTCCGTAGACTGACATTGAAATATAACTATTAAACA  
ACGTTACGTGAACTGAAAACCTTCATCTTAAATAAACCATTTATTGTTCTTACCTTTGAAC  
ATACAACTTGTGACGATCAATTTTCGACACGTTTAGTTGGTTATGGGGCCGTCCACAA  
GCCTTAATCCATCGCAAACACTTCGCTGAATTTGTCTTTGGTTTGGGAAATGGGATAAA  
ACGGACATTCTCCACCCTCTCCGGATACCTGGTATCGTTGTTACATGTCCCCCATGCACA  
CGTCTTACCATTCTTACCAATAGTCAAGATATTTTCGTTATTGTTTACGTTATACAGCGTG  
AAGCAGGAAGTACAGTGACGACAAGTTGTCGGAGGTAATGGCGGACAATCGAACAC  
GCGCTCTGATTGGCTAGATTTTCATAACAACCGCGTTGCTAGCAACGACCTGGAAGGG  
TGAATCGAAGACGAGTAACGTAAGTTGGCTGATTGAATCAGTTTACTGTAACATAGGTC  
TATCACACATTTCTGCTCTTGAAAACGATAGGCTAACATCGAATTTTAAAAGATAACTTG  
AGCAAGATATGACTGCCAATAATATTTTGTGCTGCGTTAACAGGAGATGAGAATATTGT  
AACCTGTTCCCGCGGATTCAGCATTCAATATTATGTTGACTGTAGGCCTATTTCGTTGATC  
CTTTTATTTTCACCTGCGCTGTTATATGACTTTTTTATAATTGGATTAGGAATTGAAATTGA  
TCTAAGAAACCTTATATTTTATGCGTCCACCACGCACTCCATGTGATTTTCTTTGTCAAG  
AAAGTCTGGAGATATATGAATAAAGAAGAACGGTATTCACCGATTCAAATAGGCCTAAC  
GTTACATTCGTCATGGAAATAAGAGTGATGTTGTGCATGGATTCTATTCTTCATATAAGT  
GTAGGGCGTTTTTACAGCCGTGCTACCCCAACTGAGAACGACACGTGTATATAAACCTCT  
ACCGCTCTACCAGGTGCGGGAAAACCACTTAAATTTGTGTATTATACGCAAACCTT  
GAGTATTATACCTCAATTGGAGTATGGATTTGTTACTAAAAATAATCTAAATTACTGAATT  
TTCAAATTTTGCTATACTTTATAAAAAATAGCATTGGTATATGCCAAGATAAAGTCCAATT  
TACTGAAATTTGTGCAGTAGAAGTGTTAATTGTTACTTAGGAACTTGATGCAACTTTTCT  
CAAAGTATTGCATCAATTTTCAATACTTTCCGACATGGAAATAAATCTATATTTTGCATTA  
GTGTTGTGTTTCATAGTTATATAAATGCGATTTGTGGAAATAGTTTTGAAAAGTTAATTTT  
AAAGCAATTTCTCTATTTTTTACTTATAGTAACAAATCTTATATATACGTATATACTCCAAT

TTAGGTATAATACTCTAGTTTGC GTAAAATATGCAAGTTGGTGGTTTCCCCGACCTGTCT  
ACTGCTAGTAGACTGACTAGTATATCTTTATTTTAGATAATTTTAACAAATCTTCATGTAT  
TTCTATTAAAATTGCGTATGAACTCCATATAGATCTAGCGATGCTCATAATGTAGGGAA  
CCGCCATACCATGTCTCAGCTGCTGGCCTTGTGCAAAAAGTAAAAACACACATGGGAT  
TTATAAGATGAGTCCTAAACTGTCCTGTATTTAGGATTTTCATTAAGTGTTTTGTAATATT  
ATTACAGCAAACTTACAAGCTACAAGGTTAGTGGCATTTTAAACCATACTGTTATATAT  
AATTAGCCATCAGCTTGGATCTGGTCGCAGGGGTGTAAACATTTATTTCAAAGCACTAG  
CCCAGGGCTAGTAGACACCAAAATTTCACTAGCCCGGCCTAAATATCTACTAGCCCAGC  
AAAAAAAAAAATTGGAAAATTTATAATACCAGTATTTTTTATACTGTATAAATTCAAATATT  
TTTAATTGAGTGAGTTTTTTTTTAATTATTTGCATCTAGTTTTTTTTTTAAATTCAAATAAAC  
ATTAAGAAAATCTTTAATCTGTGTTATTTCTAGAACACAATTTTATAGATTTTTTTAAATTC  
TGAAACCGGATTCTGGATTCCCGACCTTTGACCCGGATATTAGAATAACCATAACAAAT  
ATGGCTGCCTGCTGCAGGCATGGCTTTGCTGCCGACTTTTGGAGGAATAGATTCCAGTT  
CTTTAACATCGTTTTTTGTAATAATAAAATTTACTGATCTGATAGCTGAGATGACTTATTT  
GATGGTTTGTATATTGTTTTTCTAGAACTTGTGTTGCAAATTACGTAACTTTCACATGAA  
ATGCTATGCATCACTATTTCACTGTGGTGATCGGGAGGTCTACTGTACCTGTCTACAGTCG  
TAAATAAATTACACAACATGACTCCAGATTAAGATTTAAAGTTAGATACGAATATTACAT  
AGAATTGCAATGTTTTAATTTTAAAGTGTTATTATGACTTAATATTGATGTTTTTTCGTTTT  
GAAATATCTTTGAAAAAGTCACTAGCCCCGGGCTAGTATGGCTAAAATTTCCACTAGC  
CCAAGCTGAAAATTTGGTAGCCCCGGGCGTCGGGCTAGTGGATTTTACACCCCTGCT  
GGTGCCGTACAGGTTGTGAGTTTACTCACAATATGATTATTGCAAGCAAAATATACCGAT  
ATTAGATTTTTTTCAGCATTTTCAGCCCTAAGAAAAAATACATTTGCAAAGTACACTGG  
TGTGTACACAAGTTTTTACGGTATTTGTAACAATTTACCTGTGGATTGGTGACAGTACTC  
GAGTTAAGGATGTCACGGTTCACGTTTTTTTCAGCTCGGTTTCGGTTTCAATATTTTTTAT  
CGATTTTTCGGTTTTTTTCGGTTTCGGTTCTGACTAATCTTACTTAAACACTATTTAAGTCTAT  
TTACTATCAAAAACAAGTTTTACTTTAGATTTAAAAAGATGGTACATCACTCAAACAAA  
TGTTTTTAGCTCACCTGGCCCAAAGGGCCGGTGAGCTATTGCCATGGCGCGGGCGTCCG  
TCGTCCGTGCGTCGTCCGTCCGTCCGTCCGTCAACATTTCCTTTAAATCGCTACTT  
GTCCTAGAGTTCTGCATGGATTTTAACCAAATTTGGTCAGAACTCTCTTAGGGGAAGG  
GGATCAGATTTTGCATAAATGGTGACCCTGACCCCCCTGGGGCAGGAGGGGCGGGGCC  
CAATAGGGGTAATAGAGGTAAATCCTATAAAACACTACTTGTCTGATAGTTCTGCATGG  
ATTGCAACCAAATTTGGCCAGAACTTCCTTAGGGGAAGGGGATCAGATTTGCATAAA  
TGGTGACCCTGACCCCCCTGGGGCAGGAGGGGGCGGGGCCCAATAGGGGTAATAGAGGT  
AAATCCTATAAAACGCTACTTGTCTAGAGTTCTGCATGGATTGCAAACAAATTTGGCC  
AGAACTTCCATAGGGGAAGGGGATTAGATTTTGCATAAATGGTGACCCTGACCCCCC  
CTGGGGCAGGAGGGGCGGGGCCCAATAGGGGTAATAGAGGTAAATCCTATAAATCGCT  
ACTTGTCTAGAGTTCTGCATGGATTGCAACCAAATTTGGCCAGAACTTCCTTAGGGG  
AAGGGGATCAGATTTTGCATAAATGGTGACCCTGACCCCCCTGGGGCAGGAGGGGCGG  
GGCCCAATAGGGGTAACAGAGGTAAATCCTATAAATCGCTACTTGTCTAGAGTTCTGC  
ATGGATTGCAACCAGATAAGGCCAGAACTTCCTTAGGGGAAGGGGATCAGATTTTGC  
ATAAATGGTGACCCTGACACCCCGGGCAGGAGGGGTGGGGCCCAATAGGGGTAATA  
GAGGTAAATCCTATAAATCGCTAATTGTCTAGAGTTCTGCATGGATTGCAACCAAATTT  
GGCCAGAACTTCCTTAGGGGAAGGGGATAAGATTTTGCATAAATGGTGACCCTGACC  
CCCCTGAGGCAGGAAGGGCGGGGCCCAATAGGGGTAATAGAGGTAAATCCTATAAAAC



GCTACTTGTCTAGAGTTCTGGATGGATTGTAACCAAATTTGGCCAGAAACATCCTTGG  
GGGAAGGGGAACAGAACTTGTATAAATTTTGGCTCTGACCCCCCGGGGGCAGGAGGG  
GCGAGGCCCAATAAGGGAAATAGAGGTAAATCCTATAAATCGCTACTTATCCTAGCGTT  
CTGGATGGATTGTAACCAAATTTGGCCAGAAACATCCTTGGGGGAAGGGGAACAGAA  
CTTTTATAAATTTTGGCTCTGACCCCCCGGGGGTAGGAGGGGCGGGCCCAATAGGGG  
AAATAGAGGTAAATCCTATAAATCGCTACTTGTCTAGAGTTCTGCATTGATTGTAATCA  
AATTTGGCCACAAACATCCTTTGGGGAAGGGGAAACAAAACCTTGTATAAATTTTGGCTC  
TGACCCCCCTGGGAGCAGGAGGGGTGGGGCCCAATAGGGGAAATAGAGGTTAATCCTA  
TAAATCGCTACTTGTCTAGAGTTCTGCATGGATTGCAACCAAATTTGGCCAGAAACAT  
CCTTGAGGTTAACAGAATTCGTATAAATTTTGGCGTTGACCCCTGGAGCAGAAAGAG  
TGGGGCTCAATAGGGGAATTAGATGAAAATATTCAAATTCCTTTAGAAAAGAAACAATG  
AACTTATATTCAGAACATTATATAGCATTACAAACCAGGTGAGCGATACAGGCCCTCTG  
GGCCTCTTGTTCTCTATCAAAATTTTATTTTCGATTAAAAAACATTAAAAATAATTAATTG  
AGTCCTGAAAAATATCAACGGCGCAATATCCTATATATGGAATAAAGTACTGATTGTGCA  
TGCAACAAAAAAAAAAAAAAAAAATACATCATTTTATAGACATATAACACGATTTAATACCA  
ATTTTTGTTCAAATGTTGAGTATCATTTATGATCTGTTCGGCAGTGGAACACCTTTAAACA  
GACATAATTAACATTAACCTGATCTTTTTAACTCTTTCAGTATTCTTGACGCATTTAAAG  
TCGCAGAGACAAGTCCTCGTATCATTTATGATACATTATTCCATCACTAAACATTTCCC  
CGAACTGTATCCTTCAAGACGCATTATTACCTCATGTACCGCAAATCAATACATCGGTAT  
TATCTCGAAAAAGTGTTTAAAAGAAGTAATATACATTGGAATTATAATAAAGATCAACAT  
TATTATGTACCAGGTGCATGTTCAATCCTAAAATGGTTTAAATTCACGGATTATTGGCTGA  
CGGAAACGGGATTGTTTACAATCGCAACACAATGGCGGCCTGATTTAGCTGCCGATATT  
CTGCGGGATTGTTATAAAAAAAAAAATATAAAAAACATCAACAATTATAATATATCAAAC  
AATAAGTGAGATATATCATTTAGATATTATGTATGTGCAAAAAAATGTCCGCAGACAGCA  
AAAAACGATCTTCTGAATGACTGAACTTGCACACATGTTACACATATATGTCAGTCAAC  
TGGGGTATTTTTCGGGATTCTGACAAAAATCTCGCCGTATTTTCAATGAAATAATCAGCA  
ATACAGTTTATACAACACGTACATTACAAGTGAAATAGGAGATTTAATTTTCTAATGAAC  
CAAACCGAACTAAGAATCATCGTACCGAACTGAACCATACCGTTGAATATTTTCGGTTA  
ACCGTATTTTTCGGCTAACCGTGACACTCCTTACTCGAGTCTATAAATAACAAGCTACAC  
TTATTCAATACATCGATACAAGTCAGCGGCAGAGCGGTATGGGTTTATATACACACTTCG  
TTCTCAGTTGGGGTAGCACTGCTGTAATTAAACCACTCCAAGTGAAGGCTATAGTGAGA  
TTGAGATCAGACTTCCTCGGAGAGAAAACCTGGCCATGGTCGATGTTTAAGGGGGAAT  
ATGCAGTTACACATTTGAAAGTGGGAGTAGTCTAGCAGGTTTTATTTGTAAATAGTTGG  
CACTACAGGCACTGGTAACCCAAAATGTGTTAATCTTGCCGAACTTGTTAGAATAACG  
GCAGAATACTTAATTTTTAACAAGTTTCGGCAGGATTAGCATATGTGCTTTTTTATTTCAG  
TATTAACCCTTTATATTAAGTCTTTTCCTCAGAATCCAATTCGATTATAAAAATTAAGTA  
TTTCTGCCGTAAAATTAAGTATTTTCTGTCCGCCGTGGGTCGTGACGGCTGACGGTCG  
AATAACAGAGGGTATCAGTCACAATCACGGCTATTTATTGCTACATTGTCGGAGGTTGG  
GAATCGCCAACTTTTCCGATGCGACGGTGAAATTAACAGATTCGGCGATAGAATTAAG  
AGTTTCTGCGTTTATATTCAGTGTTTCTGCGTTTATATTCAATGTTTCTGCGCTAATATTA  
ACACATTTCTGCTGCTTACATCGAGCGGGCGCGCCGAGCCGTGACGGCCGAGCACACG  
GCTTACACAGGTAACTTTACCTTGTGAAACGAGACTTACAGTACGTACAGCCGCCAG  
CCGATTGTACATGTAAAATATTTATGTTTACAATTCTCTTTTCCCCTTTAAAAATACATATA  
TCCTCATTATCCTATTCTCCTATCTTTTGTTGTTTACTTTCCCGCGTCTCGTCATTTGAGCT

ATTCATTTTGCACCTTTTTTCGGAAGAGTTCCGATACGAGCGGTAACAAATGAATAACT  
GTCAAGCGGTAACAAATGAATAACTGTCTAGGTTATGTGTAAAATATGTGTATATACACG  
GGGATTAACATATGACAAACAAATTATGTGTTTGATTATGTGCAATTACATGTATGTATATT  
CTTCTCACAAATTTGAATTGTTGACGATATAAAATAAGATCGTTTTCCATAAAATAAAT  
AAATATTTGTTATTTACAGACGTTTTGAAAGATATTTTGCTGTTGCCTTTAATTGTAAAAT  
GCTGATTAAGTGTTATACATAATGATCTGCTTTTCAGGTTTGCTGAATTGATTTGATATAC  
ATAAAACGACTGATATCATATTCTGGTAATATTTGATTACTTTGTTGCATGTAATTCCAGT  
ATTTATTTATTTCTGCGTTTATATTCAATGTTTCTCCGTTTATATTCAATGTTTCTGCGTTTA  
TATTAACACATTTTCGTCGCTTACATCGAGCGGGCGCGCCGAGCCGTGACGCAAGGTAA  
GCCTAGTACTATACATGTATACAGCATATATACGTATACGTTAGATCTACAATTTGAGTTT  
TTCGAGTAAATGGTTATTCTAGCTTTATGATGTAGATATTTTCAGTTTCAAAACATTCCAT  
TTACACCACTTCAAAAATTCAAACAAGCATATATTTAACTTTAGATTAGATAATCAGTCC  
AATTTGATAGCGATATCAAAATGATGTTCCGATCAGTCTGGACTGAGATTTAGAAAGCA  
TATGATGTAAATTTGAGTGAATAAAAAAAGTATAATGTAACACTATCTTTTTTACGA  
GTAAAATCCCAAATTTAGCATGAATATATCTAGAATCCGTGTTTTTATTTCAATCAAAT  
TCTGCTATAATGGTATGATGAAAACACGGCACGGTTTTTGAGTAAAAATAAATGTGGA  
CGTTTATCAGTTATGTGATATTGGAGTTACAGTACCGAACTTATACCGAAAATAATATGT  
ATATCTATATTGTTGCCTTTGAAACTTTATCCATAACGTTTACTAAAAAGCAGAAATACAT  
CAATGGTATTTCTGATATATGTTCCCTATATTTAAGGTGTAGATTTAAATTCATTATTTCAA  
ATTATACTAAATCCTTAATAGTATATTCATTGTCGACCGTTTTGTATATCATACCGAGATTT  
AATAGTATGATATATGAACATTTATCGTATAATCCAAAAAGTAACCACATACAGTGTTCA  
CAGGCATTAAAAATAGATAGATATAATATCTTGTATCTTTTTTATATTTAGTGTGATAATGT  
TGTAACCTTCTTGTATGACTATCCATGTACATTAAGATTCGAAACGGTGAAAATACATG  
CTTAGAATTTTACTAATACCTTAGAAATTACTGGAGATTGCTATATGCCACGATTCCGTA  
ATTACAGTCTAGACTGGAATAATTTTAAAGGTTAAACCTTTAGTTGAACTAGTTCCTAGA  
ACCATTTTTGTTTCTGAATAAGACACCTTCCATTTTTGTTTTACCTGCATACGACATATAT  
ATATATGTGCATGTAATATGTATTCCTAGGTATGATCAGGTATATTTTATTTCCATTTGCTTT  
TCCATCTTCATTCTAAAAATGGAGGTGACAATAAAAAAACCTAGAGCATAGATGTACG  
GGGTTTCCATAATTCAAATCACAATCCAATTAACGGATGTCCAAACCTGATTGACAGTA  
AGACAATAGCAAATACCCGATATAGTCCACCGAATAGCAAATTGCCCGCGGCCAGGTAA  
TTACAGGTGAGTTCGATGAATGGCGTTGTGTACAGGTAAATAACATCCTGGTCAAGGTA  
TTACATAACCATCAAACCAAAGGCATGGCTAATTATATACATGTATCTATAATGTCGGTGT  
ATCTACTAGTATATCGATTAAAAATTGAAAGCGACCGCACGGTCTAAAAAAATAGTTTG  
TTTTGTTTAAATATCTCAATATTTAGATCTTTTATAATATCGAAAGTTAATTCCTTTCTACCAC  
ATGTTGAAACGTATTACGGTATTGTAATAAATGTATCTCGATTATTTCGGTTAGCAACAC  
ACAACACAATGTTTGTAATGATAAATCATCGGTGTGTACGTATGTCAAGCATCATATCCT  
TGATGCTTTAATCAAGAATTTCTTCAATTGTTACGTAAAATTTCAATCTACAGTCACAAA  
CTTTGCAATTCACAATGTATCAAAGATACAGACTACAGGAAAATATTATTTAATTAAAGC  
GTATTCGTTGCTGAACTCCTCGACAAAAAATCGGAACTTTTATTTCTGTGTGGATTTT  
CTTTCATAATTACACGAAGATACCTGCTATTAGAGCACAAATTAGAGTATTTGAAACATC  
GAATTTCACTCTTTTAGTTATTTATATTCGAGACAAAGTTATTGTACGATTAACTTCACTC  
AAAAGTAATCATAAAAAAATCTTTTATCGGCTTTTCCTGTGACCGTCGATGTAAGTGAT  
AGCACATCAGTTAAAGTACAGCAATAAGCCACGGACTATTGTGACGTCACACGGTTTA  
GGGCTAGAAAATTTGACCTCGATATCGGCGGTTTACAGGTTATTCCGGTCGCGCGCGGC

ACGGAGAGGGTTTCTACACGGTCTAATAAAGCCATTTCAGCATAAACTGAAATTATCAT  
TTTTGACTGCACAAATCCTTTAAATATATCATGGATGGATTATATAAATGCTTATAAATCCT  
TGTATATATGTAATCGTGTTCCGTATTTTATTAACACTTTTTGAACCTTGATTAGGCCTAAT  
AGTTATCGGACTAACGCACCATTTTATCATGATAAAAATGTAAATGTGTACAGATTACCG  
AGTACCCGAATGTACTGTTACGTGAATCTCCTAAAATTGCTGACTTGCAATATGGCGTG  
TGTGTCAATGATTATATATATAAAGTCAAGTGAATGTATTATATATGCCAATTCATAAATAC  
TTGGTACTGAAACCACCCCATTTTGTATCCCAACATCGTCAAAAGTATCATCAAGGAT  
TTATAAGTGAGAACTGTCTCTTTACCTTACTAAACACCACGCGTAACGCTAGACGAACC  
GGGAAATCGAGTCCAACGAAACACCAATGTAAAGTTAATAAAATTTCACACGTTTAG  
TACTTGCTTTAAGGACGGAAGATTTAGAAGATATGTCTTAAATTTTTGTAAAAAATACG  
ACAACCTCATGAAATGACGCTTCAGAAAGTAAGACGGTAACCCTCGCACCCACAAGCTA  
CATCAAAGGCTGCGCCGGCGGATATCAACGGAAAATCAGTCGTCGCCCAACGTCACGG  
TCAGTACACAAACGTAAAAGCTCCTACGTCGTA CTGCCCCAAAACCCAGCGTGACTTT  
TTCACCTCACTTAAGTCCTTGATATCATCAAGGATGCATTTTAGACAAAAATCCTTAGTA  
TCATATTATCATCTTATTATAAGCGACCGCGGTGTGAAAAAGTGCTCACAGAAATTAGA  
CATACACTACATATGAAACTATATATACTATGGTCTCATTA AATTATTAGGTAGCTGTATG  
ACTGTGTTTCTGGTGTTAAAAATCATACACATATGATCGCATTGAAAAAGTGATACAAC  
CATCGTCGGCCATTTTTCTCACTTCGAGCTCCCCAAAATGCATACGCATCCCCTTCGTAA  
CCCCGCAGGGGTACCGCTAGCTAGCTCCTACCCATGGTGTCAGGATGGCCCCAATAGG  
GCAAGCAATATCCACGGCGTCCGTTATCTGTGGAGTTAATTAGTCGGATGACACGTGTG  
CGGTACACAGTACACCTGAGAGGTGTATCTATGGCGACAACATATAAGTAAATGTACAG  
GTAATATAATTCAACTGACAGAGAGAGAAGAACATATACTGGCAATAAGTTTTTTTTTTT  
TTTTTTTTTTTTTTGTAAAGTTCATTCTTTGTAAACCCCCATTAAAGTGTA CTGGGTAAA  
AAGGGTCTTCCCGAACTTCACTGACAATCTAGTCTCTGTCTTTCGTTGATTAGCATTTTG  
AGTATATAATTTTTAACAAATGTATAGCACAGTGATCGTTCATATGATATTTTATGTTAAC  
ATAGTGACGTTGTGTATCGATTACGTCACGCACTAAATATAGCATTGAAAAAATTGCTAG  
CCGTTGGTCGGTTTGTGTTGACACAATATTCCATGTTAATGTGTATTTTATGGTGTAATAA  
ATAACATGCCAGCTATGATAACTCCCAGTAACTGGGTTTCGAAAGGTGTGCTCTTAAAC  
TGAAAATTGTATGAAAATTCTGTTATTATGTGACCTTCTATTAGTGCTTTATTCGATTCTG  
TGCCATGACGGTTCATCAGGATATTTATTCAAACCAATATTATTTTCACTTTTGTGTCTCT  
TTTTATAAAAATAAGATATGATGATTAACACAGACACCGGTATATCCCGATGTCATTTCTT  
ATAACGAGTTGTACATAGATCTAACAAATATCCCCAGCTAACCAGTTGCTTTTAAAGAC  
GTTTTTAATATTGTCCAGTGATAGTAATATTAGGAAAAAAAAAACCTTTAAAGATATTTT  
AGGTGTAACGACGTCACGAGTATAAAAAATGCATACTGAATCAGAAACGTATAAAAAA  
ATAATGTATGTCGTTAAGTTTCAGATTCAATAAGTTAATCGACAAAGAAATAATAATTTT  
AAAAAATTCGTTGAAACCTCACTACCATTATGTGTAAACTGGAATATGAAGAAATATAC  
ACGTTTTATCATTTAACCAATCGATGAATACAGCTCCCTATACTACTCTCCTTATGGTCGT  
ATCCAGAGTACCTCTCTTTGACGACACAAAATAAATCATACATGACCAAGCTAAGTTCG  
CTTCGTTGTAATAACATAGGCCTGGGCATGGCCTCGTAATTAGGGTAGTAGTAAAAACC  
TTTACCATAACACTGACTAATTAGCAAAGACAGTATATCACAATTGTTTATTTAAGTCAA  
ACATGTAATTATGTAATATCAAATAAAAAAAAAAACAATTGTGAAAAAGAGTGATCTTTT  
TAATGACCAATTAAACTTCTTAATTGCCGGAATCTTGTTTTGATTTTATAGTCTTTGTCAT  
TCCGACAAAAAATATCAGTGGCCAAGGCTATAAATACTCCCTCACACAATCCTTATAGTA  
TCATACAACATGAATACCTTTCAAGAAGCAACCTACCGATACCTGTCCAGCGACACCA

AGAAGACCTGCATCCTCGGTCACAGCTTTATCAGACGCCTCATCGCCCGATGGAGAAA  
AGAAGAAATACCACTACCAAATTGGTCATTCCATGCCTTCGGACGAGGTGGTTTGAAG  
CTTCGACAGCTGAGAGACATCGTACTAGCCGAAGATTTTCCATCTATCACACCGTCTT  
TGTACAGATAGGCGAAAATGACATCGCTGACCAGTCAACGGCCCGTACAATTGGACTT  
CTTCAAGAAATCCATCAACTGTTTATCGCCCAGGGTGTAGAAGTGGTGATGTTTCGGCG  
AGCTTTTTCCGAGACACGATCGCAAATTCACAAGACCGCATCACTTATCAACAGAAT  
GATGAAGAAACAACACCCTGACATCATTGGCAACGCGACAGAGACTTGTTGATGGTA  
CACACCTGAAACCGTCGGCGGAAGTTGCTTCTCCAACAGCATTGACCGGGCCATCAG  
ACACATGAGAGCTTGATCTTATAATCAGCCAATCCTTTATAAAAAAAGCCATTTTCAT  
GGCTACCCAAATATCACAAAAAGACCCACGAACACTCGAAAATACGCATTTATATATTA  
CGAATTATATATCTTTAGCATGAATAAAAAACAAGTAAAATTGACACGTGTATACTATTT  
ATAATTTTATTTTAAATAATTGACGAATACTTCTTAAAACTAAACATGTATTTAATCAGAA  
ACATATATGTATAATTGTTTCTGACAATAGGAATTAAATTTTATCATATATCGTACTAATCG  
TATTAGTTCACCAGTTAAGTTTTGGCCTCTATACTGGCAACAAAGTACATCAAATAATTA  
CCAGAATATGATATCGGTCGTTAATGTATATCAAATCAATTCAGCAAACCTGAAAAGCA  
GATCATTATGTATAACACTTAATCAGCATTTTACAATTAAAGGCAACAGCAAAACGTCT  
GTAAATAACAAATATTTATTCATTTTATGGAAAACGATCTTATTTTAAATATCGTCAACAAT  
TCAAATTTGTGAGAAGAATATACATACATGTAATTGCACATAATCAAACACATAATTTGT  
TTGTCATAGTTAATCCCCGTGTACATTTGTTACCGCTCATATCGGAACTCTTCCGAAAAA  
AGATGCAAAATGCATAGCTCAAATGACGAGACGCGGGAAAGAAAACAACAAAATATA  
CATGTAGGAGAATAGGATAATTAGGGTATATGTATTTTTAAAGGGGAAAAGAGAATTGT  
AAACATAATTATTTTACATGTACAATCGGCTGGCGGCTGTATGTACTGTAAGTCTCGTTT  
CACAAGGTAAAGTTTACCCGTGTAAGCCGTGTGCTCGGCCGTCACGGCTCGGCGCGCC  
CGCTCGATGTAAGCGACGAAATGTGTTAATATTAGCGCAGAAACATTGAATATAAACGC  
AGAAACATTGAATATAAACGAAGAAATAAATAAATACTGGAATTACGTGCCACAAAGTA  
CATCAAATATTACCAGAATATGATATCGGTGCTTTAATGTATATCAAATCAATTCAGCAAA  
CCTGAAAAGCAGATCATTACATGTATGTATAACACTTAATCAGCATTTTACAATTAAAGG  
CAACAGCAAAATATCTTTCAAACGTCTGTAAATAACAAATATTTATTTATTTTATGGAA  
AACGATCTTATTTTAAATATCGTCAACAATTCAAATTTGTGAGAAGAATATACATACATGT  
AATTGCACATAATCAAACACATAATTTGTTTGTTCATAGTTAATCCCCGTGTATATACACAT  
ATTTTACACATAACCTAGACAGTTATTCATTTGTTACCGCTCGTATCGGAACTCTTCCGA  
AAAAAGGTGCAAAATGCATAGCTCAAATGACGAGACGCGGGAAAGTAAACAACAAAA  
GATAGGAGAATAGGATAATGAGGATATATGTATTTTTAAAGGGGAAAAGAGAATTGTAA  
ACATAATTATTTTACATGTACAATCGGCTGGCGGCTGTACGTACTGTAAGTCTAACTTTA  
CAAGGTAAAGTTTACCTGTGTAAGCCGTGTGCTCGGCCGTCACGGCTCGGCGCGCCCG  
CTCGATGTAAGCGACGAAATGTGTTAATATTAGCGCAGAAACATTGAATATAAACGCAG  
AAACACTGAATATAAACGCAGAAACTCTTAATTCTATCGCCGAATCTGTTAATTTACC  
GTCGCATCGGAAAAGTTTGACGATTCCCAACCTCCGACAATGTAGCAATAAATAGCCGT  
GCACGTAACGAAGTTGGGTAATTGTGACTGATACCCTCTGTTATTCGGCCGTCAGCCGT  
CACGACCCACGGCGGACAGAAAAATACTTAATTTTACGGCAGAAATACTTAATTTTATT  
AATCGAATTGGAATTCTGAGGAAAAGTCTTAATATAAAGGGTTAATACTGAATAAAAAA  
GCACATATGCTAATCCTGCCGAACTTGTTAAAAATTAAGTATTCTGCCGTTATTCTAAC  
AAGTTTCGGCAAGATTAAACATTTTGGGTACCAGTGAGGGTGGAGCTGCGGTCTGG  
GGTAACAGGTTTCAGCTGGCAGCACACTACTCTCTCCTGTTAGCCAGAGATGCTCTGG

TCATGACACTAATTAATATTTATCTGGTGTAGGGCCAGAGCGCACTGCTATATCAAAAGG  
TGGAACCTGCCAACACCGTTTGGTATCTCCCTGTTACATAACTGATAAGTACTTAAAAA  
ATTGTACTTTCTAAAGCAGAAATATATGACAATTCAAATTATATAACTGGATGAAAAGAT  
GAAATGATTGAATACATGTGTGTGGTTTTTTAGATCATATACCACTAGTATCATGTTTCTA  
ACTAATGATAAAGATTTTCTTTCCCTCTACAGATTTATGAAATTACATGATGCCCAAATCTA  
AGGAATTCATTTTCATCATCAGAGTCTGATGTGGACTCTGACGAGGTAATTACATTTCTTT  
TCTTTTCCATGGACTCTGACGAGGTATACACAATTACATTTGTTTCCTTTTCCATGTCTA  
ACGCTTCAGGTTATCTGTGCATGAACTTATTAAGCTTGAGTCCATTCCATTGATAACTAG  
ATCAGATAATTAAGCCGTTCATAAAATAGTATAGTGTCTTATATATATATATTAATAAGTGT  
CAAGGCTAGAGCATCTCTGGCTAACAGGAAGAGTACAGTATGCTGCCAGATAGTGTCT  
GACAAAGTTTTAAAGACACTTAGCTCATCTAATCCTAGTACAGTATGCTGCCAGATAGT  
GTCTGACAAAGTTTTAAAGACGCCTAGCTCATCTAATCCTAGTACAGTATGCTGCCAGA  
TAGTGTCTGACAAAGTTTTAAAGACATCTAGCTCTTCTAATTCTAGTACAGTATGCTGCC  
AGATAGTGTCTGACAAAGTTTTAAAGACACTTAGCTCATCTAATCCTAGTACAGTATGC  
TGCCAGATAGTGTCTGACAAAGTTTTAAAGACGCCTAGCTCATCTAATCCTAGTACAGT  
ATGCTGCCAGATAGTGTCTGACAAAGTTTTAAAGACACCTAGCTCTTCTAATCATAGTA  
AATGCCTTAAAAAATTTTAAAATGCTTTAGAATAAGTTTTTGCTGTTGGGTCCATTTAAG  
ATATTTCTCTGGAATTCATTTTTATCTCACCTGGCCCGAAGGGCCGGTGAGCTTATGTCA  
TGGCGCGGCGTCCGTCCGTCCGTCCGTCAACATTTCTTTAAATCGCTACTAGTCTGCA  
TGGATTGTAACCAAATTTGGCCACAAACATCCTTGGGGGAAGGGGAACAGAACTTGTA  
TAAATTTTGGCTCTGACCCCCGGGGGACAGGAGGGGCGGGGCCCAATAGGGGAAATA  
GAGGTAAATTCTTTAAATCGCTACTAGTCATAGAGTTTTGAATGGAATGTAACCAAATTT  
GGCCACAAACATTCTTGGGGGAAGCTTCTTATGCAACATTGGCTGTAGTTAGCAGGATA  
AGGAAACACATACATATATACCCTGATAACCAATGATGATTTACCGGTTTCTATTACATAT  
ATATTTTCTAGTCATTTAATTTCAAAATAAAAAGCCTATGCAAATCCTGCCATTGTCCAG  
AAATGACAAAATAAATTATTTTTATAAATAAATATAATAAAGGTGATGATGGGGGGGGGG  
GGGGGAGAAATGCTTATAACTTAATATAATAGAACTGAGGGAAAAATAAATATGTAAAA  
TAAGTATGTAATAGAATACCCAAGCGGGTCAAAAAAGAGCAATATAAACAAAATAAAA  
ATACAAGCAGGATAAATAGTATACAGTAATTAACAATAGTTCAAATAACAAATATGTAAT  
AGAATACCTAAGCGGGTCACAGAAGAGTAATGTATATGAAAGAAAATACTAGTCATGTG  
AGGAAGGGCTCATAGTATTTGAAATAAAACAATTGTTTATAATCCACTAAATTTTCATTG  
CTTTATAACATACTTAACATAATAATTATGATAAATTCTCTATTAAGTAGATACTTTGATTT  
CATTTACATAATTGATTTTCACTGACTAATTCCTGATTTTAATACCCAATAGAGAGATTAT  
TTTATTCTTTAATATTTTCAAGCCAAAGCCCAAAAAGAAGAAAAGAGAACAAAGTGCCTGA  
AAGCAAGAAAGAAAAGCCTGAAGCTTCTCAAAGTAAAAAGCCAACAAAGGGAGCAA  
ATGGAGAGCAAATGTTTCAGGTTCAATTAAGTTTGACTTTTATAATAGATTTCTATTTTTT  
CGTCCTTTTGAAACGTTGATAGGAATATTTAACTTTGAAGTTAAACCTTATTTATCTTAA  
CATTTTAGTGCTCTTATGTTTTAGAAATGACCCTTTTGAGTTTTGAAAGAAATGATGCCC  
ACTTATAATTATCTGCATACATTATTTACAAGTTCTTCAATTATTTATTTGATTATTTCTTG  
AATATTTACTACAAATCTGAGAGCTGTAACAATTCTTTGTTATACATACACTGTATATATA  
TTCACAATAGTTTTCTTACAATGCAATATTTGATAGATCAATGTCGTATTGATAAGATACA  
ACACTGTATTTTGTCAATAGCTTGAAATATGGTATTAAAGTATATTGGTTCTTGAAAAGA  
ATGTCACAAAATCTTATTGGTATTGTGTCTTAAAAGAAAGTGCACAAACCAAAAAGAA  
ATGGCAATTACAGCTTTATTCACCAACTTAAAATCCCATTTAATGGATCGAGTTGATGTT

TACAGGGAATATTAACCTTGACATTATGTGTTCCCTTATCGAGTTGATGTTTACAGTGAATA  
TTAACTTGAACATTATGTGTTCCCTTATCAATGTTTACAGTGAATATTAACCTTGACATTAT  
GTGTTCCCTTATCGAGTTGATGTTTACAGGGAATATTAACCTTGACATTATGTCTTCCTTAT  
CAATGTTTTCTGTGAATATTAACCTTGACATTATGTGTTCCCTTATCAATGTTTACAGTGAA  
TATAAACCTTGACATTATGTGTTCTGTATCGAGTTGATGTTTACAGGGAATATTAACCTTG  
ACATTATGTGTTCCCTTATCAATGTTTACTGTGAATATTAACCTTGACATTATGTGTTCCCTA  
TCGAGTTGATGTTTACAGGGAATATTAACCTTGACATTATGTGTTCCCTTATCAATGTTTAC  
AGTGAGTATTAACCTTGACATTATGTGTTCCGTATCGAGTTGATGTTTACAGGGAATATT  
AACTTGACATTATGTGTTCCCTTATCGAGTTGATGTTTACAGGGAATATTAACCTTGACAT  
TATGTGTTCCCTTATCATTGTTTACAGTGAGTATTAACCTTGACATTATGTGTTCCCTTATCG  
AGGTGATGTTTACAGGGAATATTAACCTTGACATTATGTCTTCCTTATCAATGTTTACAGT  
GAATATTAACCTTGACATTTTGTGTTCCCTTATCAATGTTTACTGTGAATATTAACCTGAAC  
ATTATGTGTTCCCTTATCAATGTTTACAGTGAATATTAACCTTGACATTATGTGTTCCCTTATC  
AATGTTTACAGTGAATATTAACCTTATACATTATGTGTTCCCTTATCAATGTTTACAGTGAAT  
ATTAACCTTGACATTATGTGTTGCTTATCGAGTTGATGTTTACAGGGAATATTAACCTTGTA  
CATTATGTCTTCCTTATCAATGTTTACTGTGAATATTAACCTTGACATTATGTGTTCCCTTAT  
CGAGTTGATGTTTACAGTGAATATTAACCTGAACATTATGTGTTCCCTTATCAATGTTTAC  
AGTGAGTATTAACCTTGACATTATGTGTTCTGTATCAAGTTGATGTTTACAGGGAATATT  
AACTTGACATTATGTGTTCCCTTATCGAGTTGATGTTTACAGTGAATATTAACCTTGACAT  
TTTGTGTTCCCTTATCAATGTTTACAGTGAGTATTAACCTTGACATTATGTGTTCCCTTATCA  
ATGTTTACAGTGAATATTAACCTTGACATTATGTGTTCCCTTATCAATGTTTACAGTGAATA  
TTAACTTGACATTATGTGTTCCCTTATCATTGTTTACAGTGAGTATTAACCTTGACATTAT  
GTGTTCCCTTATCGAGTTGATGTTTACAGGGAATATAAACCTTGACATTATGTGTTCCCTTAT  
CAAGTTGATGTTTACAGGGAATATTAACCTTGACATTATGTGTTCCCTTATCAATGTTTACA  
GTGAGTATTAACCTTGACATTATGTGTTCCGTATCGAGTTGATGTTTACAGGGAATATTA  
ACTTGACATTATGTGTTCCGTATCGAGTTGATGTTTACAGGGAATATTAACCTTTTACATT  
ATGTGTTCCCTTATCAATGTTTACAGTGAATATTAACCTTGATGTGTGTTTAGATGTAGATTC  
ACAGACTAACCTTCTGTAATGGATTATTTTACAGCTTTCCAAAATGCGGTTTGTGAGTGTC  
AGTGAATTCCGAGGCAAAGTTTTGGTGGAATAAGAGAGTACTATGAGGCTGATGGAG  
ATCTCCGACCAGGCAAAAAGGTTAGGGCTGTATAGGCTTTCTTAACTTGGTACATGTT  
TAACCTGATGAGTGACCTCCGACCAGGCAAAAAGGTTAGGGCTTTAAAGGCTTTCTT  
AACTTGGTACATGTTTAACCCGCAGAACACCTCCGACCAGGCAAAACAGGTTAGGGC  
TTTATAGGCTTTGTAACTTGGTACATGTTTAACCCGATAAGTGACCTCCGACCAGTCA  
GAAAAGGTTAGGGCTTTATAGGCTTTCTTAACTTGGTACATGTTTAACCCAATAAGTGA  
CCTCCGACCAGTCAGAAAAGGTTAGGGCTTTAAAGGCTTTCTTAACTAGTACATGTTT  
AACCCGATGAGCGACCTCCGACCAGTCAGAAAAGGTTAGGGCTTTATAGGCTTTCTTA  
ACTTGGTACATGTTTAACCCAATAAGCGACCTCCGACCAGTCAGAAAAGGTTAGGACT  
TTATAGGCTTTCTTAACTTGGTACATGTTTAACCCGATAAGCGATCTCCGACCAGGCAA  
AAAAGGTTAGGGCTTTATAGGCTTTCTTAACTTAGTACATGTTTAACCCAATATGCAACC  
TCCGACTAAGCAAAAAGGTTAGGACTTTATAGGCTTTCTTAACTTGGTACATGTTTAA  
CCCGATGAGCGACCTCCGACCAGTCAGGAAAGGTTAGGGCTTTATAGGCTTTCTTAACT  
TTGGTACATGTTTAACCCAATAAGCGACCTCCGACCAGGCAAAGGGCTTTATAGGCTTT  
CTTAACTTGGTACATGTTTAACCCAATAAGTGACCTCCGACCAGGAAAAAAGTTTAA  
GGCTTTAAAGGCTTTCTTAACTTGGTACATGTTTAACCCGATAAGCGACCTCCGACCAG

GCAAAAAAGGTTAGGGCTTTATAGGCTATCTTAACTTGGTACATGTTTATGTGATGAGTG  
ACCTCCGACTAGGAAAAAACGTAGTACATGTTTGATCCAATAAGCTTCGTGTATATTC  
CCTCTGCTCTAAACCTCAACTTCAATTTCTCCCAAGCGTTTTCACTATATATTTAACTCT  
ATTAAATGACCATCTCTCTAATGCGGCCAGGGACCACTTAACTTCCTTCCTGTGGTTGCT  
AAAAATCCCTTTACTGCGACCAGAAAAATGAATGTCTTTTCGATCTTTCCAGAATGCTT  
GTCATCAGGTGCGCATTTTGACACGGCTTGGACAGAGCAATTAAGCTTATAGCTTGTTA  
ATGTAAACAAAACAGTGTGAAGCAGTTAGCCTGTGATTGAAACCCTATATAAATAATGC  
TACACTGGCCATGTGATAATTGTATCTGACTGGTCTTTTTACACCTTTAATTTGTTACCAT  
CAGACCCCGGGGCCTTTAGACGGAATGGGTCAAGCTCAATGGCAGTCTCCATACATTTT  
AAAGTATATTATGGTTAAATAATGAACTGTTTGATACAAAAATGATGAACATTGTTTAAA  
AGAAACACTAATAGTGACTGACAATAGGAGATTTTCAGAAAAGATGGCGATGACGTCAC  
ACAAAGGTACATCCGGGCGCTCAAAGGTACAACCTCTGTATAGCTGTACACATTAACATG  
TGGGAATACCGCCGCTTGCGATGTTTGTTTACATTTTAGCCCCACCATCATCAGATGGTG  
GGCTATTCAAATCGCCCTGCGTCCATGGTCCGTGGTCCGTGGTCCGTGCGTCCGTCCGTA  
ACAATGCTTGTTATCACTATTTCTTAAAACTGCTGCAGGGATTTTGTTCAAACCTTCAC  
ATGGAGGTTACCTTGGTCCCCAGTTGTGCCATACAGATTTTGAGGCTGATCGGAAAA  
ACAAGATGGCCGCCAGGCAGCCATCTTTGATTTTGGCAGTTGAAGTTTGTTATCGATAT  
TTCTTGAGAACAAACAGAAGGGATTTTGTTCAAACCTTCACATGGAGGTTACCCTTGGTC  
CCTAGTTGTGCAAAACAAGATGGCCGCCAGGCAGCCATCTTTGATTTTAGCAGTTGAA  
GTTTGTTATCAATATTTCTTGAGAACTACTGAAGGAATTTTGTTCAAACCTTCACATGGAG  
GTTACCCTTGGTCCCTAGTTGTGCCATACAGATTTTGAGGCTGATCGGAAAAACAAGAT  
GGCCGCCAGGCAGCCATCTTTGATTTTGGCAGTTGAAGTTTGTTATCGATATTTCTTGA  
GAACTACTTAAGGAATTTTGTTCAAACCTTCACATGGAGGTTACCCTTGGTCCCTAGTTG  
TGCCATACAGATTTTGAGGCTGATCGAAAAAATAAGATGGCCGCCAGGCAGCCATCTTT  
GATTTTGGCAGTTGAAGTTTGTTATCGATATTTCTTGAGAACTACTGAAGGGATTTTGTT  
CAAACCTTCACATGGAGGTTACCCTTGGTCCCTAGTTGTGCCATACAGATTTTGAGGGTG  
ATCGGAAAAACAAGATGGCCGCCAGGCAGCCATCTTTGATTTTGGCAGTTGAAGTTTG  
TTATCGATATTTCTTGAGAACTACTGAAGGAATTTTGTTCAAACCTTCACATGGAGGTTAC  
CCTTGGTCCCTAGTTGTGCCATACAGATTTTGAGGCTGATCGGAAAAACAAGATAGCCG  
CCAGGCAGCCATCTTTGATTTTGGCAGTTGAAGTTTGTTATCGATATTTCTTGAGAACTA  
CTCAAGGAATTTTGTTCAAACCTTCACATGGAGGGTACCCTTGGTCCCTAGTTGTGCCAT  
ACAGATTTTAGGCTGATAGGAAAAACAAGATGGCCACCAGGCAGCCATCTTTGATTTT  
GGCAGTTGAAGTTTGTTATCTATATTTCTTGAGAACCAATTGAAGGAATTTTGTTCAAAC  
TCACATGGAGGTTACCCTTGGTCCCTATTTGTGCCATACAGATTTTAGGCTGATAGGAA  
AAACAAGATGGCCACCAGGCGGCCATCTTGATTTTGATAGTTAAGGTTTGATATCCCC  
ATTTCTCAACAAGAGGCCAATGGCCTCGTAGCACGATGGTCCAGTTAATTAATGTTCAA  
TGATTGTTTTTGACTAATATTCTTGATTATCACTCATATGCACTGTTTAACTAATAATTA  
TTAGGACAATTCAAATGACCACTGGTATTTAATTGTTATCAGTGTTGGTATTAAAACAAT  
CATAATATTCTTTCAAGACAGATGTCATTCATCAAATGTTAAGTTATATATAGATCAACAG  
TTTTATAAAAAAAATTGATTTGTGCAGAACAGTTGTTTTTTCTGAGCAGGATTTTAGT  
GTGAGCGTATGCAGAAGCAGCATCTTCTAATTAAGAATATTGTTGGGACCAATTCAAAT  
GGCATCAACTTACCTTTGATATAAGAAAATTTAATAAAATTCAAATTTAACAATGCTGT  
TTATCCAAATTTATCAGAATATTGTTATATGATAAAAAATAAATGGGGAACTTTTTCTGT  
ATGATTGCTTATCGGTATCATACATGTACAACCTATGTATAATTAAAGTGTTAAGTTGACTA

GACTTTTAAAAGATACCTGCTGGAGGAGGGCTTAATTCATTATAGGTGACAAAAAAA  
AATCAAAGATGTTTGGCTGTCCTGGTTATAAGAGGTGAACTGAATTTGCTTCAATACCT  
TGAAATTAATTACTTATCTTTTATCTCATTTTCTTCAACACAATATAAATTTACAAATTA  
GATAACAATGCACAAGTTGTATTGGCTGGGTCTCGGCACAACGGAATGTTACTACGGG  
TCAACAAATTGACATTGGCAGCTACAGTCGAGCCTTTCCCAGGGCCTTGATAACAAAA  
CACATTAATTAACCTCTCAACCATTTGTTTTCCCTTTAACAGTAAATGGTATATGTAACACA  
TTTACACACACATATAGGCCTATAAACAGCATCTAGATGAAACTAGGGCACCTGACTTG  
TGACACTGTCCAGGGAATATAGATTATCCAACACAGATAATTATGATGTCATGACACTTG  
AGTAACATATTTAAGAAAAGAAAAATAATGAATATTTCTTAATTGCCTTAATCTTTTCTTA  
AACTATATTTCTCTTGTATGAAGTGGTACCGTCGGCCATATAATTTCCCATATGCATTGT  
GTTTCTCATTTAAATATTACTATAGACAAAGAAGGAATGAAATATATTTTAATTCCTCAA  
AAATACAGTTTATGTCTGTTTGTGCGCAAAGTTTATCAGTTCCGTCCTTATCTATAACTAC  
ATGTCTGTGCCAAATTTCAATTGCTGTTATTGGTGTATAACTTGAGATATCCTGTTCACTAG  
GTGATTTTCAAACTAGGGGGTATGCTATAAGCTTCGATGGAGCTATGCTCCATCGTGCT  
AAAAAGTGCTGAAGGGATCTTCTCAAATTTAATATGTAGGTTACCTAGGGACCTAGT  
TGTGCATTTTGGACCAATCGGTGAACAAGATGGCCGCCAGGCCGCCATCTTGGAATTC  
GATAGTTAAAGTTTGTATCGCTATTTCTCTGAAAGTACTGAAGGGATCTGTCTCAAAAT  
TCATATGTATGTTCCCTAGGGCCCTAGTTGTGCGTATTGTGATTTGGGACAGATTGATC  
AACAAGATGGCCGCCAAGGAGTCATCTTGGAATTTGATAGTTGAAGTTTGTACCGCTA  
TTTCTCAAAAGGTACTGAAGCAATCTGTCTCAAATTTTATATGTAGTATGTTTGAAAAAG  
TTTAAAAAGTAGAGAAAAGATCCATCTTTCCTTTGTCAGATATAGATCATTCTTTGGTGG  
GCGCCAAGATCCCTTTGGGATCTCTTGTATTGTAATAAATTGTACGACAATCCAAGAAA  
TGTTGCTTTATTTTCATTTCAAAAAGTGTAATGAAAGTATGTAACAGTAATATATAGATA  
TAAACATATGATATTCATACTTTGTTTAGACTCCATTTTCGACTGCCCCGCGAGAAAAACA  
TGGTCGCCATTACCGTTTAAACATTGACAGAATATTGCAAATATTGGCTTGAAATTACAG  
ATTAAATTTCAAGTTCCCCAACATATCATACTGTCAATTTTATAAAGCGATTACTGTGTTGT  
AAGTCTTACATGGTAAAACACCAAATCACGATTTGTGATTATGACAAAATTAAAATTTG  
TTTTCATAGATTACCCCAAGCGCACGGCAGCCATATTAAGTACTGCCGACATCCTGAATT  
TCGACCTTTTTCAGAGTAACCAAATTAAGTATTCTTGATAACTTTTTTCGTCAAAAATTTT  
TGAATTGAGTTTATGATATGCAAATGAGTCAATTTATAGTTACTTTTTATGATATTTTTAA  
ACAAAATTTAAGTAATTTTAGGATTCTTGAAGCCTCGTGCAATGTGTCCTGGTAGGCA  
TTTCAGTACTAAGATCTATATTTATAAATCTAAATGTAGTCAATCTAACAGGTATTCAAAA  
TATTTTAAAGTAATATCACTTCAATTTAAGACTTCATATAGCAACCCATGGAATGAAAAC  
GACTGAAAATTAACAATAAACTCTACAGCATGAAAACCTGAGTGATTTACCATTTTAT  
TTTTCGAGATATATTGGCAGCCATACGTGTACGTACACATGCATGTAGATCTGCATGTAC  
GTGTAACACAGTGGTTTAAAGCATTCTTTTAAACAAGATATGCATGGTAAAGAACGA  
AAAACACAAGTACTTATTGAGATATGTGTTGGTAATTACATATGTATTAATATTATTAATT  
TCCCCAAGTATAGGCTGTGGCCTGAGATGATCTACCAGCGAAGCCATGCACGAGCGGC  
CGTGGTCTGGCCAGATATGGTCCACATTCAGTTATATTAATAGTGTTGTGAGCAGCTTT  
TCATGACAGAAACATGACACAAAAAATCAATTATCTATTCATAACTTTTTCAAAACAT  
GGCTTAAGATAAGGTCTACATGTGAACAAAAAACGGGTACATGTGACGGCCCCGGCACC  
GCTTCGCAAGCTGGCTTCAACACTAAATCTACAGAAATATATTTAGCAATAAATACTGTA  
AATATAAAAAATATAAATGTCCCTAACCTCTGAAATAATAAGAAACCATTTTAAATTAGA  
ATTTGTAAGTATGAAAGTGTATACTTTTGTACAGTATCGATTGTGTAGCAGGGATATAC



ATATCTGTTATTGTTTTATTAGTCGCCATACTGTTTGTACCTTTGAGAACCCAGATCTAA  
ACTTTCTATGACGTCACGCCATCTTTTCTGAAATCTCCTATAATTTACTTACATGAAATTG  
AAATATGAAAGCAGTCGAACAGACATGCAGCATTTTTTTTAGGCTGCCATCTTAGATTT  
GTAATAGTAATAGACAGAACAAGAAATAGGTATGAACAATCCGAATTTAATCGGATCTA  
AATGAAAAAAATTGGAAAATAAATATATATAAGAAATCAAATAATGCCAACCTGTGAT  
CTTATTGCCACACAAATATATTGTTTGCAATAAACTTGCTTAGAACAGTATTATTACATG  
AATAAATTACTGAAATGATTTTTAGCACGATTAGCATACCCCCTAGTTTTGAAAATCACC  
TTGTGAACAGGATATCTCAAGTTATACACCATTAACAGCAACGAAATTTGACACAGACA  
TGTAGTTATAGATAAGGACGGAAGTATAAACTTGCGGACAAACAGACATAAACTGT  
ATTTTGTAGGAATTAATAATATTTTCATTCCTTCTTTGTCTATAGTAATATTTAAATGAGA  
AACACAATGCATTATGGGAAATTATATGGCTGACGGTACCCTTCATACAAAAGAAATAT  
AGTTTAAGAAAAGATTAAGGCAATTAAGAAATATTCATTATTTTTCTATTCTTAAATATGT  
TACTCAAAGTGTGATGACATCATAATTACCTGTGTTGGATAATCTATATCCCTGGACAG  
TGTCACAAGTCAGGTGCCCTAGTTTCATCTAGATGCTGTTTATAGGCCTATATGTGTGTG  
TAAATGTGTTACATATAACCATGTACTGTTAAAGGGAAAAACAATGGTTGATATCAATTAA  
AGTGAACAGTCGGGCAAGGATATAGCTAAAGATGGCTAAAGTCGGTAAAAATGGTGTG  
AATGTATCCAGTATAATTTCTTATGAAATAGAAAAATAAAATCTCTCGTCAAAATCTAGC  
TGTCTGCGTACGAAGAAATTAATTGAAAGTATGGGAATTCTAAAACATCCTCCCGGCTC  
ACTATGTCCGTGGTTACATTTCCACGCAGCCTCACTTTCAATGCTTTCAACTTTTCTTTA  
CTTTAATGGTCAGAACTGGGAACTAAGCAGAACTTGACCGTTGTTATTTCGCCGGCCAT  
GCCGGCGAATCTATTTGTAATAAGTTTGAAAACGAACCATGGGGATGGGGATAAGTCTG  
TTTGTGTAATGGTATTAAACGGATTTATTGTTAAACAAAAGTTACAACAAAAATACTTTT  
CGTGTTTTCAATCGTAATTGCAGGATTATTATAAACATATTTAAAAAAATTTGGGGCGAT  
TTGTTGTCTAAATATTCAAATATGTCCCTTCCTTAAATTAAGGAATGTACAATAAGTGCT  
CCCCGGCTAGCTTACAATTTACAAAGGCTGCTATTATGTCCACCGCTGCAAATATAGGTC  
TCACTGTGTGAGTCATACCAAATTTGCTGTGTGTGCTTCTAAAAATAGATCCTACCTGA  
GCATGGCAGCGAAGCGTGTGTGCGGTGGAACCAAATAGCTACATGTAGCTATATGTGCG  
GCTAAAGGCAAGTCAGCAGATATTCGGAATGCGTTGGGATTAATATTTGCTTTGCATATA  
TAAACCTGAAGCTGTTCCGAGGTTTCCCGTGGTTTTGTCAACTCAGACAAAGAAAACG  
GTTGTTAGTATTTTACGGAATCGTAATTGAAAAAGATACAGAACGTTTGTATAATATTGT  
GAAAATAATTAATTCTAACGACGTGATAAATATAAATTTAAATAATAGTTACAGTATTTAT  
AAATTTGGATCATGATTGTATAAAAATGTTATTTTTATGTTTATAAATTAGTTCAGTGCG  
TTCCGTACAAACGAGTATTTTATATACAACCTTTTCCTGACTGACAGACCATGAGACGT  
CGACCGAACTACGTAGAAATCTACTCTCAAGCTGATCAACACTTCAAATGTTGAATAT  
TGGTCACCAGCAATTAAACTAGTAATCATTACGTATAACCGAAAAACAGTAAAGTTTAT  
ATATACATGTATATCTCATTGACCTATCCATTGCAAAATTCCTGCCAAAAATAAGTGCCA  
AAATTTGCATATGTTTTAATTAAGGTACCTGAGGGATCAATTGTTAAATAAAAAAAAT  
AGGACAATTTTTCCAAAATGTTAATTTAATTGTTTTGTTATGTATACGAAGTAACGTTTT  
TTCCTTTGTAGGTCTATTTGGACTGAATTTTTTTAAAGTGCGTAATGTTTTACTTTATTGT  
CCTCTGTGATTTTGCCTTTGTACAATTTGTATTGTGACCAGATGGTTTCGTATATACAGT  
AAAACCCCTTTATATCGCCACCTTCTGTTTTCTAGATTTTGGCGATATATCGAGTTTGG  
CGGTATATCGGATTTGTGCTTGAAATCTTAATTAGGCCTAAATATAGGTAGTCCCCTGTG  
CCGTACTGAAACAGACTTTCCTAGTCAGTCTGTGTAGTGTACGGCCACTTCGTATTTTGT  
AATATGAACAGTTCCAAAATTAAGTAATTTTCGATAGTAGTCTTTCAATAAATATGTGAG

CTTTATGTGTGTAAAATACGAAAACCGAACACGTTTGTGCTACCACGTATCGTGCCGTA  
GTTGCCTGCTAGTTGGGATTTTCTCGGTTACATGATATTTTTATTACGGGAAATCCCGCC  
CGGAAACAAAGAATACAAGTTCTGAACAAGCGCAGTGCGGTCTGTGACCTCACTTCCG  
CGCACATGTCTGCATAAACGGCACTCAGACGACGATTTGATCTTACTAATAAACGGCAC  
CTTTGTTATTGTTTTACAGGTAGGTATATATCGCAAGTTGTGGTGAATAAACTCACTTC  
TGTACATGTGTTTTACGTACTATCGTTACGTTAGTTATTTATTGACAAAAAGGAACCCAC  
AAGTCTATTTAGAACTCTATATCACCGTTCGTTTATAGACCATAAAAATGCAACTAGCAAT  
TTCAAGAGCGATAGAAATATAACGTACGTGCAGAGGAATCCGTGTACCCATATTGTAA  
TTGATTTCACTGTGTACACACGGTCATACACGCGGCCATAGTGTGTGTAGCTGATTACC  
TGTCAGTCGGCAGTTGAGCACCATACGAAAACATGTGTCCCTATCAACAGAATTTGGC  
GATATTAACGAGGTCATTAATAGTGTTATTTTAATCATTTGTTCCGCAAATGTGATGGCG  
GATGGCGGTAGACGGGTTTGGCGATATAACGGGTGTATTTGTATGGAGGGAAATCCGTT  
CTGAATAAATTCATGGCGATAAGCGAGTTTGGCGGTAAAACGGGTGGCAATATAACGG  
GGTTTTACTGTATAGATGAGTACATCAACATGAAATATATATATATATGCTACTACTGGCA  
ATGGCATAATTACATTCCATATACTTTTACAATAAATATTGTTGATAATTAGAAATAATGCC  
TCCACAGAAAAATTCAAATTCCAAGTAATAGTCATGTTTTTCAGCATTAACTATACTTAAC  
CAGATCCATGGCCATTAACTGATTCCATTTTAAATGTTACTGTTCTTAGATGTATATATTTT  
TTTACTTGTTAAACATCAACAACTTTGCAAAGTTCAACATGTTTTCTTTCATCTATTTG  
TCATTCTGTACCATTTAACATGTGATCACATATTTGATTTCAATTCTATGTGATCACATGTTT  
CATTTCAATTGTATGTGATCACATATTTGATTTCAATTCTATAAAAAAAGGAAAACAACAT  
TGTATCAACCAGTCTCCACATATAACAAGTATTTACCTGAAATCAATGTAATCATAAA  
GCAGAAGTATCCATCACATAGAAGATTAGTCAAGTAACATGCCTTGACGAGTACAATAA  
AGATCTATCGTAAACATGTAGTATTTCTGTTTCAGTTAGCAGGTTAGCATAACAAAAG  
AATAGTTTGGCGGCGAATATTGATGCGTAGCATCAAGGTTTTCTTGTATTAATATGTGAG  
AACTTTTGGAAGGCCAATGAACGCATTTAGACTAGTTTTCTTTTCCCGACTATTCACTTT  
AATGTATTTTGTATCAAGGCCCTGGGAAAGGCTCGACTGTAGCTGCCAATGTCAATTT  
GTTGACCCGTAGTACACATTCCATTGTGCCGATACCCAGCCAATACAACCTGTGCATTG  
TTATCTTAATTGTGAAATTTATATTGTGTTGAAGAAAATGAGATAAAAGATAAGTAATTA  
ATTTCAACGTATTGAAGCAAATTCAGTTTACCTCTTATCACCAGGACAGCCAAACATCT  
TTGATTTTTTTTTGGTCACTTATAATGAATTAAGCCCTCCTCCAGCAGGTATCTTTTAAAA  
GTCTAGTCAACTTAACACTTTGATTATACATAGTTGTACATGTGTGATATTGATAAGCAAT  
CATACAGGAAAAAATTTCCCAATTATTTTTTATTATATAACAATATTCTAATAAATTTGA  
ATAAAAAGCTTTGTAAAATTTTGAATTTTATTAAATTTTCTAATATTAAAGTTAAGTTGAT  
GCCATTTGAATTGGTCCCAACAATATTCTTACTAAGAAGATGCTGCTTCTGCATATGCTC  
ACACTAAAATCCTTCTCAGAGAAAAAACTGTTCTGCACAAATCAATATTTTTATAAAA  
CTGTTGATCTATATATAACTTAACATTTGATGAATGACATCTGTCTTGAAAGAATTTTATG  
ATTGTTTTAATACCAACATTGATAACAATTAATACCAGTGGTCATTTGAATTGTCCTAAT  
TAATTATTAGTTTAAACAGTGCATATAAGTGATAATCAAGAATATTAGTCAAAAACCAATC  
AGTGAACATTAATTAACCTGAACCATCGTGCTGCGAGGTCATTGGCCTCTTGTTTTTAAA  
TGTTTTAAATATATATATATAAAAAAATTTAGGTCATCTGACCGAAGGTCAGGATGACCT  
ATTGTCATCGTGTTCGTCCGTCGTGTCGTGCCGTCCGCCATACTGCGTCGTGCGTAAA  
ACTATTTATGCAAAAGCCTACTCCTGCTAAACCCTTGAGTGAATTACATCCATATTTGGT  
GTGAAACATCCTTGGGGAAGGACAATCATATTTTATATAAATGAGATAGGTCCGACCCC  
TAGGGGCAGAGGGACGAGGCCCCAAAAGGGCAAATTTTCTTAATTTAAGCTTTTAAAT

CCTACTCCTCCTTCATCCTTGGATGGATTTTCATCCATATTTGGTGTGAAACATCATAGGG  
GAAGGACAATCATAATTTGTATAAATGAGCCTGGTCCGACCCCTAGGGGCTGAGGGGT  
GGGGCCCAAAAAGGGCAAATTTTCTTAATTTAGCTTTAAAATCCTACTCCTCCTTTATC  
CTTGGATGGATTTTCATCCTTATTTGGTGTGAAACATCATTTGGGAAGGACAATCATATTT  
TATATAAATGAGTCTGCTCTGACCCCTAGGGGCTGAGGGGTGGGGCCCAAGAGGGCA  
AATTTTCTTAATTTAGCTGGCCCACTTCCTGTTTTAAGGTTTCAGTCTCCGATCTCAAT  
GAAAATTGGTCTATAGGGGTTTTAATTGATGCCGAACAACATGAAAACATTTTCGTAAA  
GATTTTGGTATTCCAAGATGGCCACTGGCCCACTTCCTGTTTTCAGGTTTCAGTCTCCG  
ATCTCAATGAAAATTGGTCTATAGGGGTTTTAATTGATTCAGAAGCAGGAACCTTTAGGT  
GAGGACAATCATATTTTATAAAGGACCGAGCTAAGACCCATGGGGATAGAACGGTGGA  
GGTCCAAAATGGGAGCTTTGATGAAATTTGGCTTTAAAATCTGACTCCTCCTCATATTAA  
TCCTTGAATGGGTTACAACCATATATGGATGAAGGGCTACCAAGTTTGTTCAACAAATG  
ACATTTACCTATTTTCAGAACTTACATATTCAACTAAGGAGTTCCTTGATTGTTTATATT  
AATCGTTAACCAATACTTTTATACTGTGACTTTGTTGTTTTGTGCCATGAGTCAGATGACC  
GTTAAGGCCCATGGGCCTCTTGTTTTACAATATGTCATAAATGTTTATAATACTGAATT  
ATGATCTATTCATGAACAGTGAATGACAACTCATATTTTAAATCATCAAACTAACTAAAT  
CCTCCTTAACCTGAGCTACTCTATTAAGGGACCACTCTCTATTAAGAGACTACTCTCTAT  
TAAGAGACCACTCTCTATCAATTAAGAGATCACTTTTCAATTTCCCTTGAGTGGTCGCTT  
AAGATAGATTTGACTGTAATTTCAATAGTAAAGAAAATAACTGTTGCTAATTTGAGAGA  
ACCTCTAATCTGTCACTTTGGTTTCTGTATGAAGGTATATCTCTGAATATGGAGCAGTGG  
AACAACCTTAAGGAACAGATTGACGAGATAGACAAGGCCGTGAAAAGTGTGTGAGGG  
CTGAAAAACTGCAAAGTGTGTGAGAGCAGAAAAACTGCAAAGCGTGTGAAAGCAGA  
AAAAGTGAAGTGTGTGAGCAGGAAAAAGCTGTGAAAAGTTTATGAGCAGCAGGTG  
CAGTCATTTGAAAAACAGAGGAACACATCGTTGCTATCGAATGTTACATCTGAAGAGG  
AAACAAAGTTTTTTGAATGGAAGTGTGACTGACAATGTGTCATAAAAAGCCTTTGAA  
AATTGTCAGCCATAATCTAATTATAGTAGTATCATTCTTCACTTGTGCATACTGAGAACA  
CACTAAGTTTTTCACAGATGATAATATTTTTCTTTTCCCTTGCCAAAAGATAATGTTGAAT  
AGAATCATGCACATTGCTCTATCTTTCAGAAATTAAAATAACAAGTAGTCATTGAACAG  
GGAAATGAATTTAGCATGTAAATGGTACACACACAGATGGAATATCAAAGTGTATAGGT  
TCTGTTTTTCATTGATTGATCATTTAGATGATGTGAAATACTTCAGTCATGTAAACGGTGAA  
ACATTAACCATAATTGTGTTTCATATCCGTAATTGCCATTGCTTTTTAGCCCATCATTAAT  
GGTGAATGTTATTCAAATCACCTTTCAACCATGGTCTGTGGTCCGTCCGTCCGTCCGTC  
TGTCCTGTGTCCATCAGTCCTTCCATCTGCTAACAATTCTTGTTACTGCTATTTCTCAA  
ATTTTCATATGAAGGTTCCCCTTGGATTTTGATAGTTATGTTTGTTACAGCTTTTTCTCTCA  
GATAGTGCTGAAGGGATCATTCTCAAATTTTCATATGTAGGTTTCCCTAGGACCCTAGTTG  
TGCATATTGCATTTAGAGATCGATCGGGTCAACATGATGTCTGATAGATAGCCATCTTGG  
TTTTTGATAGTTTGAAGAGATGAGAAAAATCCCTCTTCTATTGTCAGACATAGATCAT  
TCTTTGGTGGGCGCCAAGATCCCTCTGGGATCTCTGGCATATCATGGCTTGTTTACTT  
TACAAAGTGAGGCTGATTAGAATTGCGGATGAGTTAGGAACAAAAGATCTGGTATTTG  
TTAACTACTTTTTAGCTCGCCTATTTCGAAGAATAGAGGGAGCTAATTTTGTCACCCCGG  
CATCGGCATCGGCGTCCCATTTACGTTAAAGTTTTTGAGCAAGTTTCTATTTTGTCAAT  
TGTTTAAAGCTTAAGTCATTGTAAATGTTTATGATTTTATTGTCCTAATGTGTATGGATGCT  
GAACGTGATAATACAACCAATTTGGGGCCCTTAGTTTTTTTTGAGTATGTTAATTTGTC  
TTATTTCCATGTTTAAATAGTAAATACTTGAACATCAACTTCTTCTGAATAGGCGAGCTT

TGCTGTTCTCCAACAGCTCTTGTTGTATACATGTACATTATCTCCCTTTGATTTAGAACTA  
TATGTCAATATTCTAAGTGAAAAATTCCATAATTTCAATGTATAATTCAGAAATTGTAGTG  
GCCATTAAGTATTTCTCATTACAGATGAAATGTCTCTTGAAC TACAATTTGCTATTAG  
AAGTTTTATGGGGGAAAAAAGATTTTGAAATGGAGAGGCATTAAGACTCTGCTGATT  
TTATAAAAATGTTATTTACTGATTTTGTAAC TATTATTAAAGTGTACATGATCAGTTGT  
GCATTCAAGTTATATAAGGAGTAATAAATACTGTATTTAGCGTAATTAGCACCCCTTCCC  
TTTCTCCCCTCATCCCATGGATCATACCACGTTCTAAAACCTTCTAATGCATACAACAGA  
AAAGTGTCCCAAATTAAATACATGAAATTCATTTTATGGCATGTATGTACCCAGGTAAAC  
ATCTTTCGCAAGTCCTTCACATATGTGAATTGTGACATAATAATTTTAATATGTCACAAA  
AGAAAGAAGGCAAGCCAGTGCTTCACTGGGACAGATTAATGTGTTACGAGTTAATACT  
AACGTTTTTGTGTCGCCACAGATATATATATTTTGTTTCCCAATAAGTGCCCCCTGTGTG  
TAAAGTTTTGATTGCCCTGCAGGGGATAATTACATCAAATACAGTATGTTACAAATATGT  
GATCGTTTTGATTGAAACAGTATTTTCAACTTATTTCTTCTGTTGACCTGAACTGAAAT  
TGTTATATTAATCTCTACCAGAGTTTTTCCCCTTTGATTTATAAATGTAAGTTGCTTACTG  
TCAGTAAAAGTACTATATGTTCAATAATATCTGTTAGAAGATACGTAAGTACCCATTCTTT  
ATTCCAATTGCTGAAAAGTGCTATCATTTGTTCTTTATTGTTATTCAGTAATCATGCATCT  
TAATTTTGTTGCATATACATATATATTTTTTTTTTATCAATTGCATTGTCCTTCATTTTTCTT  
TTGAAGCTATTTTTCATTAAGTTGACAGACTGCTAC

#### Coding sequence:

ATGATGCCCAAATCTAAGGAATTCATTTTCATCATCAGAGTCTGATGTGGACTCTGACGA  
GCCAAAGCCCAAAAAGAAGAAAAGAGAACAAAGTGCCTGAAAGCAAGAAAGAAAAG  
CCTGAAGCTTCTCAAAGTAAAAAGCCAACAAAGGGAGCAAATGGAGAGCAAATGTTT  
CAGCTTTCCAAATGCGGTTTGTGTCAGTGTGTCAGTGAATTCGAGGCAAAGTTTTGGTGG  
GAATAAGAGAGTACTATGAGGCTGATGGAGATCTCCGACCAGGCAAAAAAGGTATATC  
TCTGAATATGGAGCAGTGGAACAACCTTAAGGAACAGATTGACGAGATAGACAAGGCC  
GTGAAAAGTGTGTGA

#### Amino acid sequence:

MMPKSKEFISSESVDSDPEPKPKKKKREQVPESKKEKPEASQSKKPTKGANGEQMFQLS  
KMRFVSVSEFRGKVLVGIREYYEADGDLRPGKKGISLNMEQWNNLKEQIDEIDKAVKSV

>Arg0193880.1

#### Gene sequence:

TTTTTTTCATTTTATTTTATTTTCATTCATTCTTTTAATATAGTATAGTACGGTATGTAATA  
CATGGACTTGGTACGAATGCCAATCAACAAAACACACACACAGCTTTGAAACGAATTT  
TCAACCCACGGTTATATATATTAATAATTCGTTGTACACTTCCTTAGCTCGGGCTAACAG  
CTACGTACACGCAGGCTACAGTTTCATGGCCGGGATGTGCAGGATCACATTTTTTTTTT  
TTGAAATCAAATGAATAAAAACCTGAATTAACAAAATCAACGTCGATCTCTGCTGTATG  
GCTTTTGCTGCATATACACAGTGCTCTATGAAAGGGTGGCCTTTGATTTCCACTTTCAA  
GACCAGATGTGACATCTTTTAGTTTAGATGTGACATCAATAACTGACAAGTCGGTGT  
CACACCCGAGCATAAACACATTGATCGCCGAGTTACCGACTGTCTACATAAATATCTTG  
GATTCATTATGTGGGCATGTTTCATGTGGTAAGTCGACATATTCTTCTGTTTATGTCGACAT

ATTCCGATATGATGTCGACTTAATGCCTTAACGATGTCGACATTATTAAGTCGTAAGTCG  
GCAAATCGATGGCAGAAATATGCCACCATAAAATTGCAATATTTTCTAATTTTCGGATTA  
ACGGGCCTTCGAACTATTAGGCCTTAGCGGTTCAAGTGACCTTAAATTAACAGATGAC  
GATTACTGCGTACTAATCAGACGGCGTGACCAGACCATTATTACACGATTATCATATAAT  
AAACAAATTATTGATTGAAATTCATAGTTCAGAGAAAAATACTTTGACAACTCTCGGTA  
AAGAGAAATTGCTATCAAATTTCTTCATCTAGGTACAAACACATGCACACAATTATTTTC  
ATTAGCAATCCAATATGGCGAGTGTTATCCATTGTTTGCGCATGTGTAACAGGAAGGCG  
ACAAGTCGACAACTCGACAACACGACAAGTCGACAACACGACAAGGCGACAACCTCG  
ACAACACGACAAGTCGACATTTTACCGCGACAACACGAGATTCTGTACGCGCTAATTA  
GCGTGTTTGAAATGTCGACTTGTCGTGTTGTCGACTTGTCGTCTTGTCGTGTTGTCGAC  
TTGTCGCGGTTTCGAAAACGACTAGTCGACATTTTAACTGTTAAATCTCGGGTTGTCGCA  
GTTTGAGACCGCGACAACCTCGACAAGGCGACAACACGACAAGGCGACAACACAACA  
ACACGAGATGGCCGTAATCAGCCACCATAGAAAAGTGTTTATTTTTGAACTGTATACTT  
TGGTCGTATATTCGCCTAGTCAAAACGTGCATGCATGCCAAATGTCAGGGGTTACTATTA  
CAGACGTTATACCCACCATGGACTATCTCATAGTAAAACTGGATGCAATAGAACAGGTA  
TTTTAGTCCTTTGGTATACATCAAAAGATTTCGTATTACAAAACACTGTGGTTGACTGTGT  
GGCTTTGAAGTTGGGCGTCGCTCTCTCTGTAGTCTTCAAAGGAATTTTTATTGGCCTGT  
GATTGGTAATATTTTTCTTCTGAACTGCCTTCAGTTTTTACTATAGTCCAGGGGTGGACA  
TTACGTCAGTGATAATAACCCCTGGAGTATCGAGGATGCCCCGCATCCGACATCACCGT  
TTTATGCTGGTAAATGAGATATCAGATATCGACACAATACGTATCAAAGCTGTCAACAA  
GGTCTTCGTTTACTTCTGGTCGAAGTTGCACGAGGTTTGCCCATTCCTTCAGGTGAGAGA  
CAGACAGGTAAGTAATACGGTGCTGACGCCTTCCCGTCCACGTAAGTAAAACCTTTCATT  
GTACCCTATCCCAACGTCAACTTGTTTGGTGTTATTTTCAAATGTGGTCTTCACGCATAC  
AGGTCTTCTTTCGGACAAATACAGCACTACATCCACTGGAAGAGTATGTAAAAACCCAT  
ATATAACGGAATTTTGAATACAATCGTCAATTAATTACCTTTGATTCTTCATTAAGGTAGT  
ATAGGGAGGGGTTTCAGAATGAACAATCCAGACTGGCAGTGATAGTTATCTAATAAATG  
AATGTGCTACTAAGTTTGACTCCTAAAGTTTGATGACTTTTTTCAGAAATCTCTTTGATTC  
AGATTGATTTCTCCATTTGTAATATTGCATTTTTTTTTTCGATTTTAACAATCATCCCCAA  
ATTGCGGATAGATTTTTGAAAATATGGTGATCAAACCTAACTGCATGTACAAATTACCCA  
AAATATAGCCATACATACCGGAATCACCAACACATGACGAATGCAACCCAGGTATGTCT  
CTCCGCTCTTTCTGTGCTGATGCGTCATCATTATTTTCAGCAGTTCTAATGGCTTTGTCA  
ATGACGGTTCGGCCCTTGTAAGATCCTCCCATTCCTAATGGACAAACGGACACCATC  
TGAGGTAGGGAACCATGAATTATCCGAGTCTATATAATGATACTCGTTAAGAATTATAAA  
AACGCCTTTCTTGTAAGTTGATTTCCAAATATTTTCATAGAGTCTTCATGAATACGGAA  
CATGTGTTTTCCAGTTGGTCCTCCCTGTCGCTTCGCCTTCTGTTTTTGTGTCTTTGTCTC  
CAGTCTACAAACCTTGGAAGAACCTGCAGCTTCACTTTTATTCGCTGCACTACGTTTTTA  
TCCCGCGCCGCGACGTCCCCGCGTCTTTTGACGAGCTTTCGTTTGATACTTCTTATCT  
GTCGAAACCATTTTCTGACTATCGTTTCGATTTGTGTGACGTTTCGGATGAATTTTCCTTC  
TGAAACGCCTTCAGTGCTGATGTTATTTTTCTCTTGTCATTTGATTTTAAATCCAAAAAT  
CCTTCGAATGAGGGGAAATTGGCATCTTCATCTTTCAGAACATCCGCGAACTTTCGCTC  
CTGCCAGAAACACTTAAAGTGATACCATTGTTTTTCTCTTGATTCTTTTTCCGTAATA  
ACCAACCTTTAAAGAACCTTTGGTACCTATCTTGGCCCCACAGATAATGCATACATCGT  
GTGAGCCTCCTGAATTCGCGTATTCAACACAGAAAATGTCTGCCATGGTAGAAGAACC  
TCTAGTGGCCCTATAGGATTGTTTATATAATCCTCGTACAATGCAGAATTAGAACAAAAG

GAAGGCGACTTGTGAGAGCAACACTGATACTGGATACGATACACAATATTAACATCA  
CTTCATTTCCGATATTTGTAGGGTCTTATCAAAGCAGGTTTGGACGTGTTCTTTACAAGT  
TGTGATACTAACTTAAATGCTGATTGAGTGTATTATTGTTGATATCTATACCGTATACTATAT  
CTGGATACCGAGTATTGATATCAGTGATAAAACGATAGTTCGTTGACTGAACTGAATAC  
CTATACATGTCTAATACGAAATTATGATGCAGCTCTTTTGTAGATGCTTCTGATGTGTTCC  
GCTTTTGTCTATTTTTGCAGTGCTGCTCTTTGTATACCGCTTAACCGGCAGTTTATATAAC  
GGAATATGGCTTATTGGTAACTATGTACTACAAGCCTG

#### Coding sequence:

ATGGCAGACATTTTCTGTGTTGAATACGCGAATTCAGGAGGCTCACACGATGTATGCAT  
TATCTGTGGGGCCAAGATAGGTACCAAAGGTTCTTTAAAGGTTGGTTATTACGGAAAAG  
AGAATCAAGAGGAAAAACAATGGTATCACTTTAAGTGTCTTCTGGCAGGAGCGAAAGTT  
CGCGGATGTTCTGAAAGATGAAGATGCCAATTTCCCCTCATTCTGAAGGATTTTTGGATT  
TAAAATCAAATGACAAGAGAAAAATAACATCAGCACTGAAGGCGTTTCAGAAGGAAA  
ATTCATCCGAAACGTCACACAAATCGAACGATAGTCAGAAAATGGTTTCGACAGATAA  
GAAGTATCAAACGGAAAGCTCGTCAAAAGACGCGGGGACGTCGCGGCGCGGGATAAA  
ACGTAGTGCAGCGAATAAAAGTGAAGCTGCAGGTTCTTCCAAGGTTTGTAGACTGGAG  
ACAAAGACACAAAAACAGAAGGCGAAGCGACAGGGAGGACCAACTGGAAAACACAT  
GTTCCGTATTCATGAAGACTCTATGAAATATTTGGAAATCAAACAGTACAAGAAAGGCG  
TTTTTATAATTCTTAACGAGTATCATTATATAGACTCGGATAATTCATGGTTCCCTACCTC  
AGATGGTGTCCGTTTGTCCATTAGGGAATGGGAGGATCTTTACAAGGGCCGAACCGTC  
ATTGACAAAGCCATTAGAACTGCTGAAAATAATGATGACGCATCAGCACAGAAAGAGC  
GGAGAGACATACCTGGGTTGCATTCGTCATGTGTTGGTGATTCCGTGGATGTAGTGCTG  
TATTTGTCCGAAAGAAGACCTGTATGCGTGAAGACCACATTTGAAAATAACACCAAAC  
AAGTTGACGTTGGGATAGGGTACAATGAAAGTTTACTTACGTGGACGGGAAGGCGTC  
AGCACCGTATTACTTACCTGTCTGTCTCTCACCTGAAGAATGGGCAAACCTCGTGCAAC  
TTCGACCAGAAGTAAACGAAGACCTTGTTGACAGCTTTGATACGTATTGTGTGATATC  
TGA

#### Amino acid sequence:

MADIFCVEYANSGGSHDVCIIICGAKIGTKGSLKVGYYGKENQEEKQWYHFKCFWQERKF  
ADVLKDEDANFPSFEGFLDLKSNDKRKITSALKAFQKENSSETSHKSNDSSQKMOVSTDKKY  
QTESSSKDAGTSRRGIKRSAANKSEAAGSSKVCRLTKTQKQKAKRQGGPTGKHMFRH  
EDSMKYLEIKQYKKGVFIIILNEYHYIDSDNSWFPTSDGVRLSIREWEDLYKGRTVIDKAIRT  
AENNDASAQKERRDIPGLHSSCVGDSVDVVLVLSERRPVCVKTTFENNTKQVDVGIGY  
NESFTYVDGKASAPYYLPVCLSPIEWANLVQLRPEVNEDLVDSFDITYCVDI

>Arg0230340.1

#### Gene sequence:

AAAAAATCGTATCCTAAAAATGATAGGGGTACATGCTAAATCGCTTCAAAAACCTCGATA  
TTATTTCATTTATTTATCGACACCAATAAAAAATAAGAACAGTGAAAGCGTTAAATTTCAA  
TTTGTTCACCATTTGTATATGAAAATGAGAATAAAGTTCCCTTTTTGTATTCATACATGTA  
ATCTGGATCGCATTTCCGTACAAAACCTGAGAAAAAATGTGTGAAAATATGAAAATATCG

GATGCATTTTCATAGAGTTAAGATGTTGAATGAAGACTTGGATAAAAACAAAAGTTCAAAT  
TTATCTAAAATACATCCTTTGTGCCATAATCGAAGATGTTTAGTAAGCATGCTATGACTAT  
AGTGTACTGGTTAAAAATTTGAATCATAAATAAAAACATTGGATAACTAAGTGACAGCT  
ATATAATTTTCGCGCAGTTAAATAAACACCAGTAAGAGCCGATACATAATTACCATCAA  
GAAAATATTTACATTTGTATACATATAAGTTTGTAACCCTGGTGTGTGCATAGTAGCTGTT  
ATATAGCTTCGTCATATCAAACCTTTATAACGGGGAAAGCCGGAAAAAATTACTATCCGGAT  
CCCGTTACGATATTGAAGTTATATTATGTTATAATCATTCTGATGATCATTCCAGCTATTAA  
CCGGCCATTTTTTAAATACCCCACTCTTCTGCTGGTGTATTGAACACAGACTAAGTACAC  
GCATGTGTGTGTATGTGTGCTAACTATGTTACCATTAAAGAAAACAATATGGCGGATAGTT  
AATGTACATTTATAGGCCGTTGTTGACTATTACGAACATTCCCGATTATCTAGTGATTTGA  
GTGGAGCATCATGTTAAACAGAACAAATGATCGGTAAGTGATATATAACAACGACATGT  
CTACATTACAACTTTAACAGAAAGGTTACCGCTAACCCGCCATTAGGTTGTCGATTTAT  
ATACCCGATACATTGTATATACCCGATCTCCGTCTATATTAAGCAATGCTTCTCGACCTCC  
TATAGTCGAGCTTATTGACTATATTGACCTTCTATTGCACGTTGCCGCGCTGAAATGTGG  
TCACCAGGTTTATATTGTGAACCAGCATAGTATCCAGGTGACTTTAAGTCCGGGTCTTG  
TGAAAAGTAGTTTTTTTTAGCATTGATGCCACTATATTGTAACCTTTATCGGTAACAATGTAT  
GAAAGAATTTTTTGTCTCTAAACTGTGTAAATCCGCGTAGTACATTCTTACAATAATTTG  
TATACGAAATTTATTTTATAATCCGATGCAAACCTTATCAGAGCCTTGTTTTGTATAGCAATG  
TCAATTTTGATCTATCAGAGTTACTTCCCTTCTTGTCACCTGCGTCAAATTCTTTTCCATGA  
TGCTCCACCGCCGACAGAGCATGGGTCCATATAGAGGATTTTATATGAGTGTTTATCACA  
AAACTAGACCGTCAAGCCATGTCATACGGCCATTTATCCTGCAACTGCAACACATACTG  
ACGATTTAGTCTACCTCGTCATCTCGGCTTTCCTAAGTCTCGCACCAAATAAACCTTGT  
ATTGTAAGATACTTATCGTGTATTCTCTATGTGATAAATATCGTAAGACACGTGTGTAATT  
AATATTACTTTTATGACGTCACAGGTAGTTATATGATGTCGCATGATTATCTCAGAAGAC  
GGAAGCTTCTCATCCGAGCCGGATTTCAGCTGTTTTATATAGAGACGAAATCTTAAATTT  
TAGCTATATTTCTATTTATAACTGCTATGTAATATATAGAATCTTACACTCGCTATGTGATAT  
GATATTTATCAAACCTTTGAAATGATCTGATATGCTACTCGACTAAAGGCTCGTGGTATA  
TTCAATTATTTAACTCGTTTGATGAATTCATATCACATAGCCACTCATGTAAGATCCTGC  
ATTTTTGTAACACAATATGAAATGTTCTTAAACGCGTGGAATAGTATATCATGTTAACA  
TTTAAATCTCAAGATATCAAATAATGTAAAGAGTTCAATTAATATCATACTACGTAACACTAC  
GTGCATAAGATCATATTTAGCACATAATTAAATCGAAATATCGGCAAACCATTCAATTTTC  
GGTTCTATATAAACTGACGAAATTCGGCCCGTATTTGTTATTTCCGTAGTCTACCGAGA  
AAATCGCATGATAATATATTTTGATCATGACGTCATTATCATTATGACTTCACTATATGTC  
TTGTGGATATGTAAGACATGGTTATATGTCATGGTTGAACGGTACAGTTATGTGTAAAT  
ATTGTTTTTCGATAGCGCGAAACACAAATCACTATATGCAAACCTACATCTCTCATCCGACT  
TATCAGAAGTGTAGAAACCACTTAGTAATAGGCTAATTTTCATTTTTTAACAAAACACTA  
ATTTTGATTCAAGATTTAAAATTCTTTTGAAAATAACCAGAAAAGAATGTTTCTACTTT  
TATAAGTTAAATATTTAATCATCGTTCCTTTTCAGCCAAACCTGTTTCTAAGAAATATATA  
CACTTATGTTATGAAAGGTTTCGAGAAATACTAATAATATCAATACCGTGGAACCTCGGTT  
AATACGAACTCGAAGGGACCGAGATAAACTTCGAGTTATCCGAGTGTTTCAATTAAG  
CGAGTTCTCATGTTTACTGACTATCTCTTTACTTTGTATATATAGACTAGTTCCATGTCGT  
AAAACGATATGAACAAGAGAGATCGCTGATGGAAGTTGCAAATTGATAACAAGAAAA  
CCTAGATATATATTTTGAAATGCCGTTCTACGGCAGATTTATGAAAAAAGTTATCGGCAT  
TTTTGGCGATCTCATTGTCCAAAACATCTCATTTCGAGTTATAAGAACATTTTATGTATGA

TTTTTGCCATTTCGGACCCCCAAATTTACTTCGTATTATCCGAGTTCTTCGAGTTTTCTTAA  
TTCGAATTATCCGAGTTCTCTAAACAAAGATAAAGAGGGAATTCTGCCTGGACCGTCA  
AAGTACTTCGTATTAAGCAGTGTTGTCGAATTATCCGAGTTCCATTGTATTTTATTTTTGT  
TTCAGATGAGGAAGCGAAAACATGGATTTAGATGAAGTAAGACTGAGATCTTAAAATG  
GGATGAAAAACATGAAAATAAATGATGCTTCATGGTGAAGGAGAAAACATTTTTGTAC  
ACAACATTTGAATATTAACCATTAATTTCCGATAGGATATGGCTGCAGAGAACACGGAG  
TCCCCGAGCCATACCTGCACACTACATTTCTGTATGTCAAGTTTCAGAGAAATGCAACA  
ATAGAGGGAAGGACAATAACTTTTTGCTGTCAATTATATCAATTCCAAATAGAACTACTCC  
ACCTACAAAAGGGGATAATTGAAGCAGGATGAAATAATTCAAATTACCAGTGATAGATTT  
GTAAAACATGACATATATTTTCAATCGATCTCAATGATGCCAGTGAAATTCTGTGAAA  
CTTGTTCATCACGCAATGTGAATATAATATTATTATATATTCTGTGTGTCAATTGCATCACCT  
TTATCGGAGATAAATATGAGTTTATCACAAGCATTGTGTTGTAATTACGTCCTAGACAAA  
TGTATCTGCATAAACTGCCAAAGAAACATCGATAAAGGTTGTTTTCTGTTTAGGCCTGGT  
CAGAGGTCAAGGTTTCAGAGGTCACTCGACATGACTGGTATCACCCGATATGCTTCTGG  
GAAAAGTGTCCATACAAACAGCATGTTCTGTGGGACGAACATTGACCGCCTGACATTCG  
TAGAGCTGTTTTACGGGTTTGAAAGTATAGCAGCTTCAGATAGGATGAAATTGGAACA  
AGAAGCTTACAAGCCTCCTGCTAAACTAAAACGAAATCATCGCCATTCCGGATTGGTTG  
CCAATGGTAACGATGACGTCAGTCTTGATGGTGGTGACTATGAACTCGATGAGAATACG  
TATGATTTGTGCAACTTGATTTGTATACATGTGTTTCAGGTATAAACTTGATGTGTATGTAA  
GCATCCGGGAGTATTTCAAAGCCGTGAATGCAACGATTGCCAAGGCTACTCAAGTCGG  
CATCGCTTTGAAGTCAAGCCAATGGCATGCAGTTTGTCTGGAAACGATTTCGGAATAGAC  
TGTGCTCTTAAAGAAATAGGTGACAGCAAGGCAAAAATAAAATCTAAAGGAAACGAC  
AAAATCGAAAATGATAAAGATGAGGATGAAGAAGATGGTAAGAACGACTATTATTATCA  
CATTACCGTAAATCAATTTAGTATAATAGCTTATGGCTTCTATTGTTCTACTTTACCTGTA  
CTTGAAGCATTTTCTCGACTATTTCTGTCTCTTAAATATGTGAAACCTTATTGCAATC  
GGATAAGTAGGCTAACAGTGTCTCTTGAAAATTGTCTCTCTTATGCCTTCTTTATCCCCT  
TTCGGGAGACATCCTATATATATATTGTGTATACATTTAAAATTGCATATACGAAGCATT  
CGATATGTTTATCATACTCATAACAGTTCTAGAGATTTGCAATATAAATACAGTGCGTATT  
GTTATTTAGTTAGTTTTTTGGTATAACCGAATCGCAGGATATTTTCATGATAGAACTATA  
TATATTTCAATATGAAAATTTGCATGCATATGATTACTTCGATTTAGTTTTCTGAGAGTTA  
GCATGAACACAATATCTAGGGTGATTTACCATAATCCTTTTTTACAGAATGCCAAATAATT  
CCACTGACTTGATTTGTAGGTCAAGTCGTGTTTTCTGTTGGCTCGGAAACGAAGAATAA  
GTATATTCCGAAAGCAAAAAGAGGCTGTTGTTGATATTCGGGACTTCTCTGAAGAAAG  
GACTTTCAAACCAGGGAGTCGAGGAATAACCCTTTCTAGAATTCAGTGGAATAAACTT  
AAAGCATTGATTGATTGCGTTAATTTTTTCAGTGCTTTCAGTGTCAAAAACAGAGTGAAT  
TTTGAATAAAAAAGAACTACAAATTTACAAATTCAGATTTCAGATTATGTTTTGGCAGTG  
TTAATCAACAGAAAAACAACATATTTGTACATGTAAAAAAGCTGTCTTTACTATTTT  
TTGTATAAGACGCTTACTTATTTCTAAACAAAACACAAAAACCAGAGACTAATCTCATC  
AGAAAATTGTGTGAAAGAAGATGTTTCTGTTAAGTTATTTCCATTACCAGATGTTTTAC  
GTATCCTCTATTTTCATTGCACGTTTATGCTTATCTTATGTACATTATTCGTATTGTTGAA  
CAAGTTGTAGTTGAAGGCGATTTTAGTCCCAATTGCGAACATAAGAAGGCGGTATGTG  
GTAAAGAAGCAGTAATATGATGCAATCTTAATGGGCTACATAACGTAAGCTTCATGTCC  
CCGCTGTTACGATTTTACAATCGCTACCATGTATCAATCGACCAGTTTCAAAAACAGGG  
AAGTAAGGAAAAACAAAGCGATTTTGAAGAAAGCAACTTGTCCTTCTTACGTGTG



TGTACTGCACAATGTTATAATGACATCACAATATTTTTATGTCCTATATTGCGGCACTTCA  
ATCCTATATTGCGGCACTTCAATTCTATATTGTGGCACTTCGAAAGTGCCAATTTTTAGG  
CATATAAAACATGTATGTGGCCAATCAGAAGCCGTTATTATAGATGTATTAAATTGTGTA  
AACCACCTTGATATTCGCAATTAAACTGTTTGCGCAATTTGGACAAACGGTGTGAACGC  
GAATTTGAATATCATTATATATATAACTGTATATAATGTATTGTGATTTGCATATTACCGAG  
TTGCCTGCTCTTGCGGGTAGGTATTGATTATGACGTCATGTGCTTACGAGTGTAACGTCA  
TATACATTTTCGAAGAAATTGACAAACAATCACAAAATAATGACGTAACAATTTGTAATAT  
GCAAAGAAGGAATACACTGTATATGGATATTTAGGATTTTCAGCAAGATATTTTGATCAG  
GAATTCATGCATTTATCGATATGCTTCAACAAACAAAAAGGGATATGCTGTAAACGCC  
AAAATCAAATTA AAAAGAAGTTTACGGTATAGTACAATGTACACAATGAATATGACTAA  
AAGTCCTTTAATATATTCTTTTTTGTAAATCCATAACCCATGTCACATTGATAGTTTTGGT  
AAATACTATTTAACTTAATTTCTAAAACCATGTACTATAATTCAGACATTTATTGAAATG  
GTTAAAATCGATAGTATTTAATGCATAAAATGTATCATATTTAAGTGGCACTCAGCGTCTT  
AGATCACCTTAAATCCAATAATAAGTCATTGAGAAGCGAAGTTGAAAAGTTTAATTTCC  
GAGGGCAAATCATGATACAGTTGTTTTAAAAACACATTGTCACTCCACAAATAGATAT  
TAGCGTGCAATGTTCAACGAGGGTATATTTTACAATGTTTTATATAGTTTTCTGGTAAC  
AACTAGCTAAATGTATAATTGACCTTCGAAATGGCCACAGTGTAAGAATGAGTTTAGG  
ATAGAATTTTGACCCGGTCACTGATTGGCTTGCTAATTATTAACCTCAAAAAGTAAAAATG  
CTTTCTGACAATTACAAGAATTTAGAATTCCAGATTTAAATTTAGATTCAAAATAACAAT  
TTTGACAATGAATAAGTAGAACATTGGAAACTCATGATTTTTCAATGCAAAATGCACCT  
TATTTTAAAATCGCTACCCTTGTTGAGCTAAATAACCCAATCTTTTTCTGATTAGTGTTA  
CATGGGACTCTAGACTTTAAATATAGAACTCTATAGCCACTTAATATTTAGCTGTTTTAAT  
TAAACATTACAAAACTTTAAACAATGTGATCTGTGTTAAAGGATTTGATTGGTTCGTTTCT  
TTGTGTGTCGTTGTCATATTGGTTTATCGATTTAAGTACAGCACAGGGAAGTGTCCGAC  
ATTTCTCTCGGGTATCACCACGATTATTCCATTGAGCTTGAAATTCCTGTTGTGTTCCCA  
AGGTACACATAGACGTTGTCCTTGAGCGACTTGTTTTCGCAAGATTGATATTAAGCACA  
TATACTGGATTGGAAAACCTTTCATTATGGTTTTTTTATGATGACATCAAAGGAAACTTGA  
TATGTACTGGATTCTGGTAAGTTGATTAAACAATATATCACACAGTTATTTTACATTGTA  
TAGTTCTACCGAAATAAAATCTTGATGTTACTAAAATGCATATCAATACGGAATATCAAA  
GGAATTGTCCTTTACAATGAATCTGATTCATGACCATTATTTAATCCTTTTATTCGGGAGA  
AAATGCTGTTAGGTTGTGCATCTTGATTATTTTGAGGCATGAACCTTTCTAATACCAGAAA  
GATCCATCAGTTTGGAAACGAAGCCCATTCCTATAGGGTTGGTGTGTCATCCTCCTCAT  
CTTCATCATCTTCATCATCTTCTTCGATATCCTCCTCCTCAACAACCTTCGAATTGTT  
TCGTTTTCATTTCTGGATGACAGAATGTTGGCCAATTGGCTGTGGGGGATGAAAATTTG  
CTACATTTCCATGAACGGGAGGATGCGGAATACGGTACCTAGATGGCACTGCCCTTCGA  
TTACGTGAACGATAGTAGGGCCGAGATGCCGGTGGCCCAGGATAACGGGGACGTACCC  
GTTGATTATTGTAAGCCTGAGAGTATGGACCTGGTGTGGGTTTCGGGTAGGACCTTTT  
GTTGGGTACGGTCTTGATGTCGGGTACGGTCTTGATGTTGGGTACGGTTTGGGAGGAC  
GTGGACCGGGACGTGGAGGCATAGGAGGCGCCGGAGGGGCAGGTGGCGCCGGAGGG  
GCAGGTGGCGCAGGCGGCGCTGGGGGCATCGGGGGCGCAGGAATCGATGGTATTGAG  
TCAGGATTAACAGGTCCTTTATAAGTTGTAGATGTTGAAGCAAACACTTGACTGGCAA  
AAAACACAGTAGTAGTTGTCAGACCAGTGTTGTAGTCAGGGTCAGGATTTGGTTGATG  
CGTTGTTATCGATGTCGGGTACTCTGTTGTTGATCCCGAAGAAGGGTCCGTCGTTATGA  
CAGAACTGAAGTGGTTTACCGGTGCTCGAAGTTGGAATAATTGGAGTGATACTACTT

CCTTTTGGACCTGGTTGGGTTGTAGTTTTTCGGAGGTGTACTTGTTGTGGTCGAAGAAAT  
TGTTGAAGTTGTAGGAGATGTGGTTGTAGTTATTGGAGATGTGGTTGTAGTTATTGGGG  
ATGTGGTTGTAGTTGTAGCAGATGTAGTTGTAGTTGCAGGTGATGTTGTAGTTGTAGGA  
GATGTTGTAGTTGTAGGAGATGTTGTAGTTGTAGGAGATGTTGTAGTTGTAGGAGATGT  
GGTTGTAGTTGTAGGAGATGTTGTAGTTGCTGGAGATGTTGTAGTTGTAGGAGATGTGG  
TTGTAGTTGTTGGAGATGTTGTAGTTGTTGGAGATGTAGTTGTAGGAGATGTTGTAGTT  
GTTGGAGATGTTGTAGTTGTAGGAGATGTGGTTGTAGTTGTAGGAGATGTTGTAGTTGT  
AGGAGATGTTGTAGTTGTAGGAGATGTGGTTGTAGTTGTAGGAGATGTTGTAGTTGTAG  
GAGATGTTGTAGCTGTAGGAGATGTTGTAGTTGTAGGAGATGTGGTTGTAGTTGTAGGA  
GATGTTGTAGTTGTAGGAGATGTTGTAGTTGTATCAGATGTGGTAGTTGTAGGAGATGT  
GGTTGTAGTTGTAGGAGATGTTGTAGTTGTAGGAGATGTTGTAGTTGTAGGAGATGTTG  
TAGTTGTAGGAGATGTGGTTGTAGTTGTAGGAGATGTTGTAGTTGTAGGAGATGTTGTA  
GTTGTATCAGATGTGGTAGTTGTAGGAGATGTGGTTGTAGTTGTAGGAGATGTTGTAGT  
TGTAGGAGATGTTGTAGTTGTAGGAGATGTTGTAGTTGTAGGAGATGTTGTGGTTGTAG  
GAGATGTGGTTGTAGTTGTAGGAGATGTTGTTGTAGTTGAAGGTGATGTCGTCGTTGTT  
GCAGGTGATGTTGTAGTGGTAGGAGATGTGGTTGTAGTTGTAGGAGATGTGGTTGTAGT  
GGTAGGAGATGTGGTTGTTGTTGTAGGAGATGTGGTTGTAGTTGTAGGAAATGTGGTTG  
TAGTGGTAGGAGATGTGGTTGTAGTTATAGGAGATGTGGTTGTTGTTGTAGGAGATGTG  
GTTGTAGTGGTAGGAGATGTGGTTGTAGTTGTTCGAAATGTGGTTGTAGTTGTTGGAGA  
TGTGGTTGTAGTGGTAGGAGATGTGGTTGTAGTTGTTCGGAGATGTGGTTGTAGTTGTAG  
GAGATGTGGTTGTAGTGGTAGGAGATGTGGTTGTAGTTGTAGGAGACGGGGTTGTAGT  
TGTTGGAGATGTGGTTGTAGTTGTTGGAGATGTGGTTGTAGTTGAAGGAGATGTAGTTG  
TAGTTGTTGGAGATGTGGTTGTAGTTGTAGGTGATGTGGTTGTTGTTGTAGGAGATGTG  
GTTGTAGTTGTAGGAAATGTAGTTGTAGTTGGAGTTGTTGTAGTTGGGGTGGTAGTTGT  
CGGATTGGTAGTTGTTGGAGTAGTTGTAGTTGGAGTTGTAGTTGTTGGAGTAGTTGTAG  
TTGGAGTGGTTGTTGTTGGAGTAGTTGTTGTTGGAGTGGTTGTAGTTGGAGTAGTTGTT  
GTCGGAGTGGTAGCTGTTGGAGTAGTTGTGGTTGGAGTTGTAGTTGTGGGAGTAGTTG  
TAGTTGGAGTTGTAGTTGTTGGAGTAGTTGTAGTGGTTGTTGTTGGAGTGGTAGTTGTT  
GGAGTAGTTGTAGTTGGAATGGTTGTAGTTGGAGTGGTTGTAGTTGGAGTTGTAGTTGT  
TGGAGTAGTTGTAGTTGGAGTTGTAGTTGTAGTTGGAATGGTTGTAGTTGGAGTTGTAG  
TTGTTGGAGTTGTTGTAGTTGGAGTTGTAGTTGTTGGAGTTGTAGTTGTTGGAGTTGTA  
GTTGTTGGAGTAGTTGTAGTTGGAGTGGTGGTAGTTGGAGTTGTTGTAGTTGGAGTTGT  
AGTTGTTGGAGTGGTTGTAGTTGGAGTGGTGGTAGTTGGAGTTGTTGTAGTTGGAGTT  
GTAGTTGTTGGAGTTGTAGTTGTTGGAGGAGTTGTTGTTGTCGTTTCCGGAGGAGATAA  
TGTGGTTGGAATATTACATACCCCTTCC

Coding sequence:

ATGAGTTTATCACAAAGCATTTGTTTGTAAATTACGTCCTAGACAAATGTATCTGCATAAAC  
TGCCAAAGAAACATCGATAAAGGTTGTTTTCGTTTAGGCCTGGTCAGAGGTCAAGGTT  
CAGAGGTCACTCGACATGACTGGTATCACCCGATATGCTTCTGGGAAAAGTGTCCATAC  
AAACAGCATGTTTCGTGGGACGAACATTGACCGCCTGACATTCGTAGAGCTGTTTCACG  
GGTTTGAAAGTATAGCAGCTTCAGATAGGATGAAATTGGAACAAGAAGCTTACAAGCC  
TCCTGCTAAACTAAAACGAAATCATCGCCATTCCGGATTGGTTGCCAATGGTAACGATG  
ACGTCAGTCTTGATGGTGGTGACTATGAACTCGATGAGAATACGTATGATTTGTCAAC

TTGATTTGTATACATGTGTTTCAGGTATAAACTTGATGTGTATGTAAGCATCCGGGAGTAT  
TTCAAAGCCGTGAATGCAACGATTGCCAAGGCTACTCAAGTCGGCATCGCTTTGAAGT  
CAAGCCAATGGCATGCAGTTTGTCTGGAAACGATTTCGGAATAGACTGTGCTCTTAAAGA  
AATAGGTGACAGCAAGGCAAAAATAAAATCTAAAGGAAACGACAAAATCGAAAATGA  
TAAAGATGAGGATGAAGAAGATGGTCAAGTCGTGTTTTTCGTTGGCTCGGAAACGAAG  
AATAAGTATATTCCGAAAGCAAAAAGAGGCTGTTGTTGATATTCGGGACTTCTCTGAAG  
AAAGGACTTTCAAACCAGGGAGTCGAGGAATAACCCTTTCTAGAATTCAGTGGAATAA  
ACTTAAAGCATTGATTGATTGCGTTAATTTTTTCAGTGCTTTCAGTGTCAAAAAGTGAAGT  
GA

#### Amino acid sequence:

MSLSQAFVCNYVLDKCICINCQRNIDKGCFLGLVRGQGSEVTRHDWYHPICFWEKCPY  
KQHVVRGTNIDRLTFVELFHGFESIAASDRMKLEQEAYKPPAKLKRNRHSGLVANGNDDV  
SLDGGDYELDENTYDLSNLICIHVFYKLDVYVSIREYFKAVNATIAKATQVGIALKSSQW  
HAVCRKRFGIDCALKEIGDSKAKIKSKGNDKIENDKDEDEEDGQVVFSLARKRRISIFRKQ  
KEAVVDIRDFSEERTFKPGSRGITLSRIQWNKLKALIDCVNFSVLSLSKTE

>Arg0233380.1

#### Gene sequence:

TCAAGCAATGTTTTGATTGGGGTTGCAATCAAAGCATTCAATCATCCCCATCTGGTTCT  
GATGAGCGTCTTTGCACAGTATCACATCATCAAGTTCGTCACCGATGAAATCTGGTAAC  
AACAGCATACAGTCTTTCAGCTTGTCCTTGTTCGAAGTTCAGGGCAATCCCTTGTCT  
CGTGGGTACCAATCCTCCATCTTCATCCTTGGGCATATACCACCTCCTGATATTGACACA  
GCCATATCCACTATTTATGCTCGCGTGGAGGTTTCCGCCCAAATGTAAGTTCATGTCAAT  
GTGTTCCCTTTCTTGACTTTTTCTATTGTGTGTCGTCTATGGTACCGGAACACCTGTCCTC  
GAGTCTCTTCCACCTCGTGAGATTGAGAGCAATGCCCTTCTTTGTCTCGGAAACGTTGTCC  
CGTCCTCTCTTCCCGTATGTTCTGATGTGGATCAAAGTCTCTCCGCGAAACATATTAG  
CCACCACATAAACTTCTTTGCCTATGTGTAAGTTGCAAAAATCCCCCATCAACATTCTCT  
TTATCGTGTTCGCGGTATTGGAGTTGCAACGTCCTCGCTCCTTTGTCGTTTGGTTCCTC  
TGCTTTCATGAGTTTCGTCTATCATCAGTTTTCCGGTGGCCAT

#### Coding sequence:

ATGGCCACCGGAAAGTGAATGATGATAGACGAACTCATGAAAGCAGAGGAACCAAACGA  
CAAAGGAGCGAGGACGTTGCAACTCCAATACCGCGAAACACGATAAAGAGAATGTTG  
ATGGGGGATTTTTGCAAGTTACACATAGGCAAAGAAGTTTATGTGGTGGCTAATATGTT  
TCGCGGAGAGACTTTGATCCACATCAGAACATACGGGAAGAGAGAGGACGGGACAAC  
GTTTCCGACAAAGAAGGGCATTGCTCTCAATCTCACGAGGTGGAAGAGACTCGAGGA  
CAGGTGTTCCGGTACCATAGACGACACAATAGAAAAAGTCAAGAAAGGGGAACACAT  
TGACATGAAGTTACATTTGGGCGGAAACCTCCACGCGAGCATAAATAGTGGATATGGCT  
GTGTCAATATCAGGAGGTGGTATATGCCCAAGGATGAAGATGGAGGATTGGTACCCAC  
GAGACAAGGGATTGCCCTGAACTTCGAACAATGGGACAAGCTGAAAGACTGTATGCT  
GTTGTTACCAGATTTTCATCGGTGACGAACTTGATGATGTGATACTGTGCAAAGACGCTC  
ATCAGAACCAGATGGGGATGATTGAATGCTTTGATTGCAACCCCAATCAAAACATTGCT

TGA

#### Amino acid sequence:

MATGKLMIDETHESRGTKRQRSEDVATPIPRNTIKRMLMGDFCKLHIGKEVYVVANMFRG  
ETLIHIRTYGKREDGTTFTTKGIALNLTRWKRLEDRCSGTIDDTIEKVKKGEHIDMKLHL  
GGNLHASINSGYGCVNIRRWYMPKDEDGGLVPTRQGIALNFEQWDKLKDCMLLLPDFIG  
DELDDVILCKDAHQNQMGMIECFDCNPNQIA

>Arg0244310.1

#### Gene sequence:

TCCATACTCTCTCGAGGTAATCTTTCTCCTCTTGTGACAACATCGTGAATGCGTGTTAAC  
ATCATATTTGATCTTTTTTATATATACATAAAACAATAAAAGACTATAATCAGGGTATATT  
GATTTTTATTTACAACATTCTACAATATAAAATGCGATTTTCTTATACAGCATTATTGTTAT  
GTTCAAACAATATCTTGGTTGGGGTTACAATCAAACAATCAGTCATTCCCATCTGGTT  
CTGATGGCTGTCTTCACACAGTCTCACGTCATCAAGTTCGTCACCGATGAATTCGGGTA  
ACAGAAGCATTGAGTCTTTCAGCTTATCCCACTGTTTCGAAATTGAGGGCAATCCCTTGC  
CTCGTGGGTACCAAATCTCCATCTTCATCCTTGGGCATGTACCACCTCCTGATATTAACA  
CAGGCATATCCACTATTTATGCTCGCGTAGATGTTACCACCTAAATGAAACTTCATGTGG  
ACGTGTTCCCTTTTCTTGACTTTTTCTATGGCACCGTCGATGTCCTTCGAACACCTGTCC  
TCGAGTCTCTTCCATCTCGTGATATTGAGAGCAATACCCTTTTTTGGTAGGATACGTGCTT  
CCGTCCTCTCTCTTCCCGTAAGTTCTGACGTGGATCAAAGTCTCTCCACGGAACATGTT  
AGCCACCACGTAGACTTCTTTGCCTATGTGTATTTTGCAGTAGTCCCCCATCAACATCCT  
CTTTATCATGTTTCTGGGTATCGGCGTTGTGGGGTCCCTCGCTCCTTTGACGTTTGGTCCC  
TCTACTTTCAAAAGTTTCGTCTATCATCAGTTTTCCGGTGGCCATGTTGATTGCAGTGAA  
GAATTAGAGTGTGGACCGTTCTTATATACCTTTCACGACGTATTGCACAATCAAGATGA  
AATCTGCGGATGTATTTACAACAGTGTGTTGTTGTGTAATCCGCGAAGTATTGTATGAT  
GTTG

#### Coding sequence:

ATGGCCACCGGAAAACCTGATGATAGACGAAACTTTTTGAAAGTAGAGGGACCAAACGT  
CAAAGGAGCGAGGACCCCAACGCCGATACCCAGAAACATGATAAAGAGGATGTTG  
ATGGGGGACTACTGCAAAATACACATAGGCAAAGAAGTCTACGTGGTGGCTAACATGT  
TCCGTGGAGAGACTTTGATCCACGTCAGAACTTACGGGAAGAGAGAGGACGGAAGCA  
CGTATCCTACCAAAAAGGGTATTGCTCTCAATATCACGAGATGGAAGAGACTCGAGGA  
CAGGTGTTCAAGGACATCGACGGTGCCATAGAAAAAGTCAAGAAAGGGGAACACGT  
CCACATGAAGTTTCATTTAGGTGGTAACATCTACGCGAGCATAAATAGTGATATGCCT  
GTGTTAATATCAGGAGGTGGTACATGCCCAAGGATGAAGATGGAGATTTGGTACCCAC  
GAGGCAAGGGATTGCCCTCAATTTGAAACAGTGGGATAAGCTGAAAGACTCAATGCTT  
CTGTTACCCGAATTCATCGGTGACGAACTTGATGACGTGAGACTGTGTGAAGACAGCC  
ATCAGAACCAGATGGGAATGACTGATTGTTTTGATTGTAACCCCAACCAAGATATTGTT  
TGA

#### Amino acid sequence:

MATGKLMIDETFESRGTKRQRSEDPTTPIPRNMIKRMLMGDYCKIHIGKEVYVVANMFRG  
ETLIHVRTYGKREDGSTYPTKKGIALNITRWKRLEDRCSDKIDGAIEKVKKGEHVHMKFH  
LGGNIYASINSGYACVNIRRWYMPKDEDGDLVPTRQGIALNFEQWDKLKDSMLLLPEFIG  
DELDDVRLCEDSHQNQMGMTCFDCNPNQDIV
