# Supplementary material for: Tissue-Specific and Time-Dependent Expressions of PC4s in Bay Scallop (Argopecten irradians irradians) Reveal Function Allocation in Thermal Response
Source: MDPI journal article supplement (doi:10.3390/genes13061057), 2022-06-13
Supplement: s1 [file s1]

Supplementary Table S1.

The species and accession number for homologous sequence alignment.

| Phylum          | Species                         | Protein | Accession number |
|-----------------|---------------------------------|---------|------------------|
| Vertebrata      | <i>Homo sapiens</i>             | PC4     | NP_006704.3      |
|                 | <i>Mus musculus</i>             | PC4     | NP_035424.1      |
|                 | <i>Gallus gallus</i>            | PC4     | NP_001008479.1   |
|                 | <i>Xenopus laevis</i>           | PC4     | XP_018122022.1   |
|                 | <i>Oryzias latipes</i>          | PC4     | NP_001098187.1   |
|                 | <i>Danio rerio</i>              | PC4     | NP_001002505.1   |
| Urochorda       | <i>Ciona intestinalis</i>       | PC4     | XP_002128161.1   |
| Hemichordata    | <i>Saccoglossus kowalevskii</i> | PC4     | XP_002733216.1   |
| Echinoderma     | <i>Strongylocentrotus</i>       | PC4     | XP_001177085.1   |
|                 | <i>purpuratus</i>               |         |                  |
|                 | <i>Apostichopus japonicus</i>   | PC4     | PIK48924.1       |
| Arthropoda      | <i>Drosophila serrata</i>       | PC4     | XP_020808249.1   |
|                 | <i>Bombus impatiens</i>         | PC4     | XP_003485628.1   |
| Mollusca        | <i>Pomacea canaliculata</i>     | PC4     | XP_025077372.1   |
|                 | <i>Crassostrea virginica</i>    | PC4     | XP_022333594.1   |
| Rotifera        | <i>Brachionus plicatilis</i>    | PC4     | RNA25207.1       |
| Nematoda        | <i>Strongyloides ratti</i>      | PC4     | XP_024504874.1   |
| Platyhelminthes | <i>Echinococcus granulosus</i>  | PC4     | XP_024353350.1   |

|                 |                                 |     |                |
|-----------------|---------------------------------|-----|----------------|
| <b>Cnidaria</b> | <i>Stylophora pistillata</i>    | PC4 | XP_022799284.1 |
| <b>Placozoa</b> | <i>Trichoplax sp. H2</i>        | PC4 | RDD43754.1     |
| <b>Porifera</b> | <i>Amphimedon queenslandica</i> | PC4 | XP_003389148.1 |

---
